# Supplementary material for: Inhibitory Copulation Effect of Vibrational Rival Female Signals of Three Stink Bug Species as a Tool for Mating Disruption
Source: MDPI journal article supplement (doi:10.3390/insects12020177), 2021-02-18

## Figure S3

### Inhibitory copulation effect of vibrational rival female signals of three stink bug species as a tool for mating disruption

Aline Moreira Dias, Miguel Borges, Maria Carolina Blassioli Moraes,  
Matheus Lorrán Figueira Coelho, Andrej Čokl, Raul Alberto Laumann

#### *Boxplot of variables*

#### *Models diagnosis*

#### *Abbreviations used in the figures legends*

*eh* = *Euschistus heros*

*cu* = *Chinavia ubica*

*ci* = *Chinavia impicticornis*

*TRAT* = *treatment*

*C* = *control*

*T* = *treatment*

*FC* = *female control*

*FT* = *female treatment*

*MT* = *male treatment*

*FS1* = *female song 1*

*FS2* = *female song 2*

*MS1* = *male song 1*

*MS2* = *male song 2*

*DP* = *pulse duration*

*TR* = *repetition time*

*FD* or *DF* = *dominant frequency*

*PTD* = *pulse train duration*

*PTRT* = *pulse train repetition time*

*Euschistus heros*

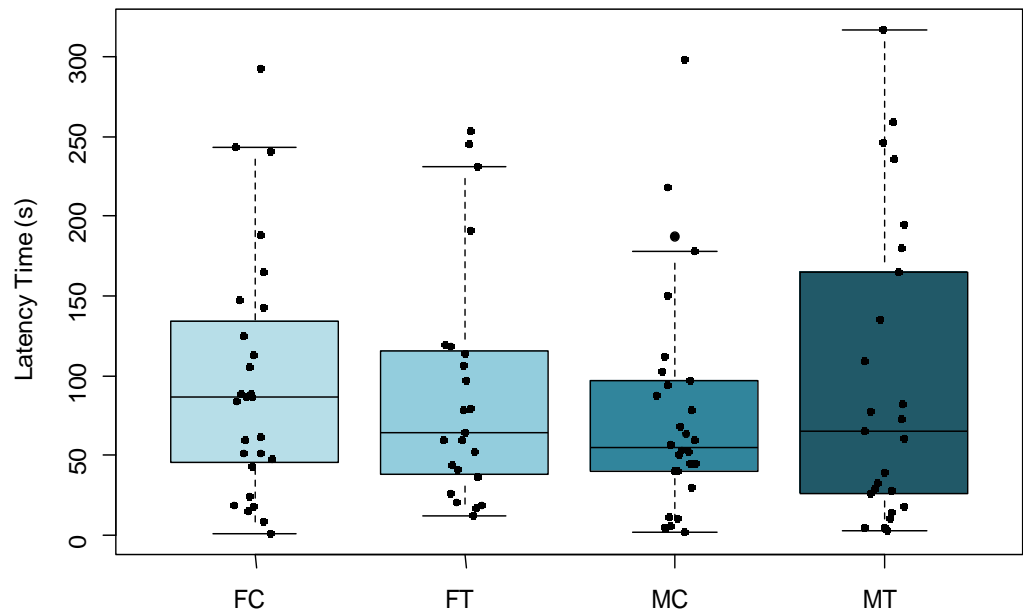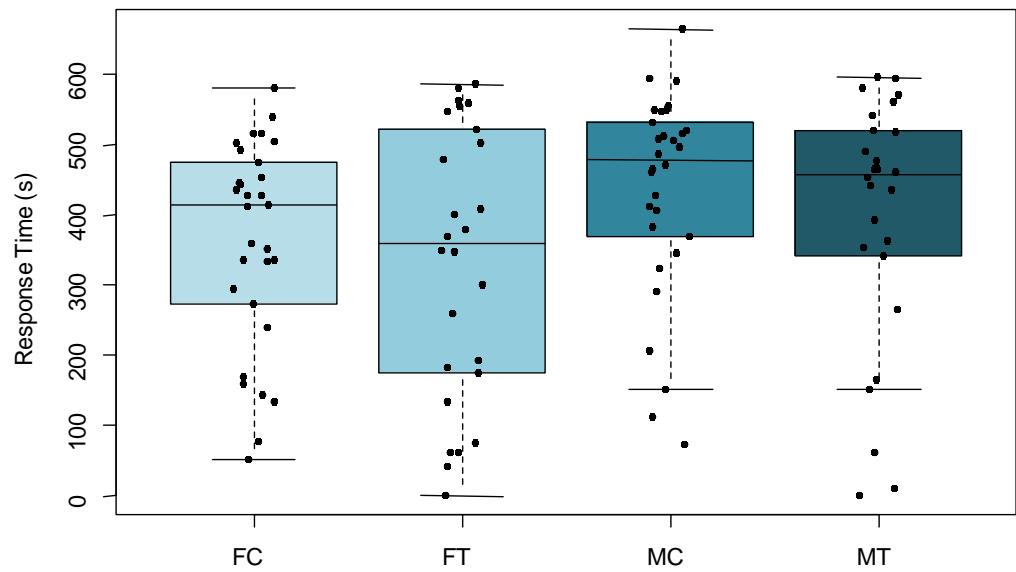

*Chinavia ubica*

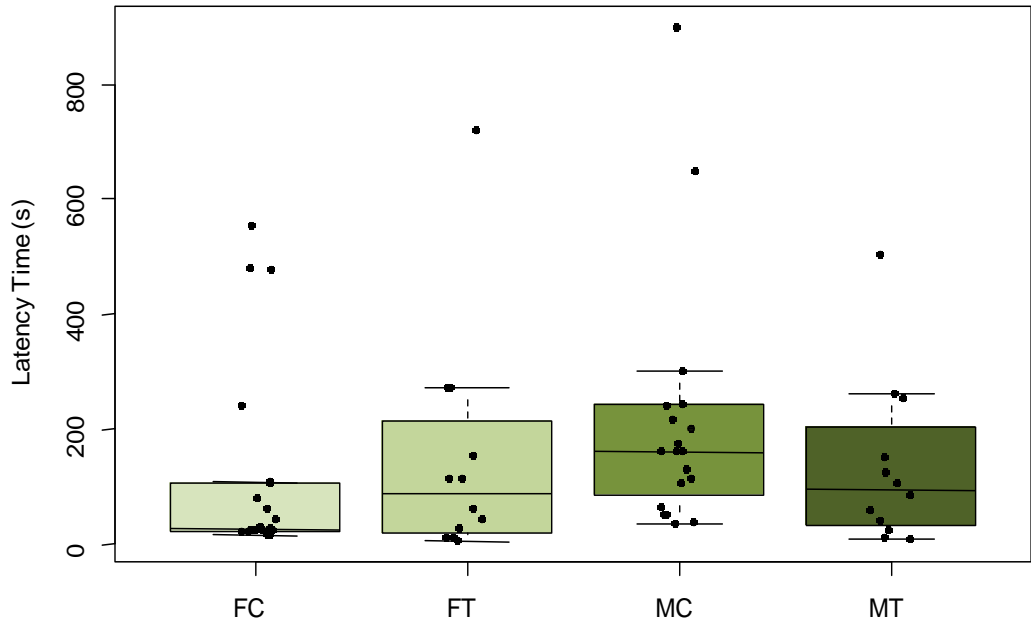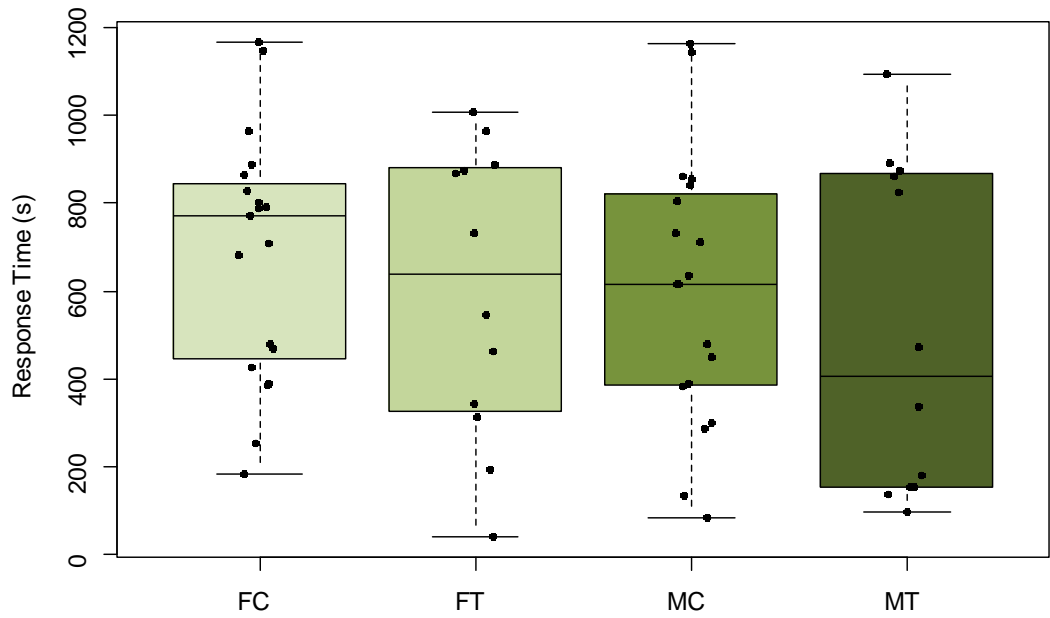

*Chinavia impicticornis*

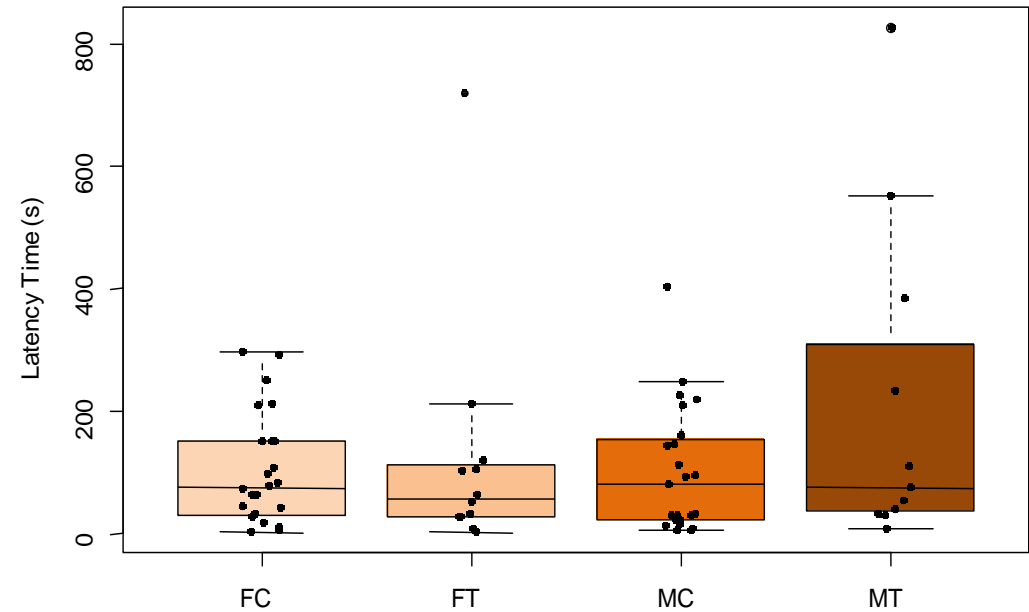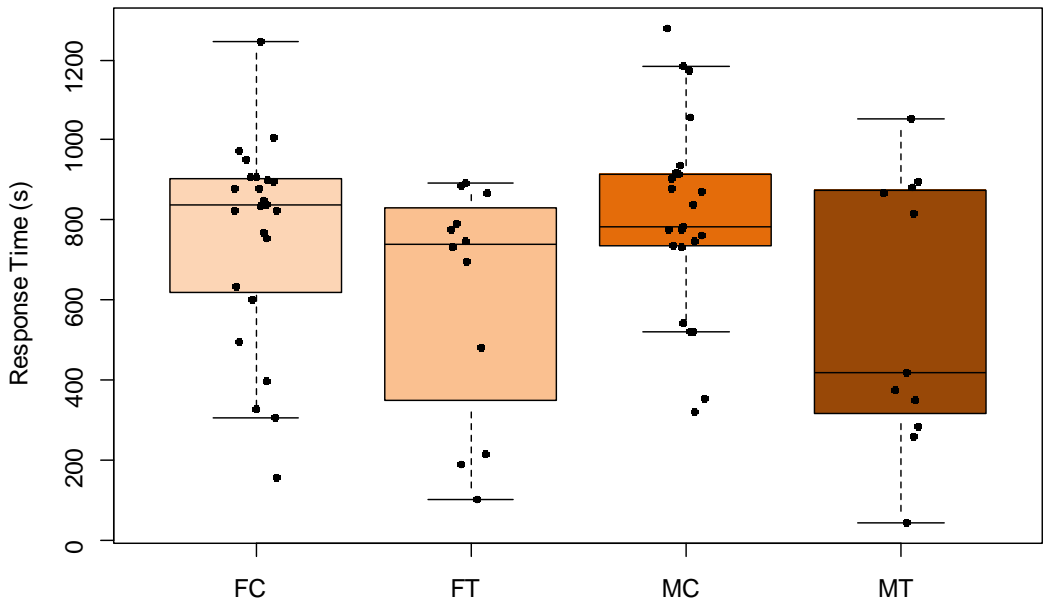

# Euschistus heros FS-1

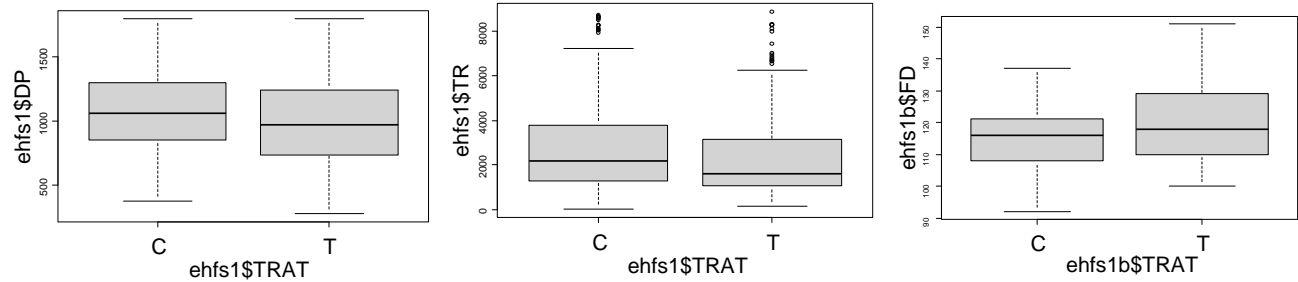

# Euschistus heros FS-2

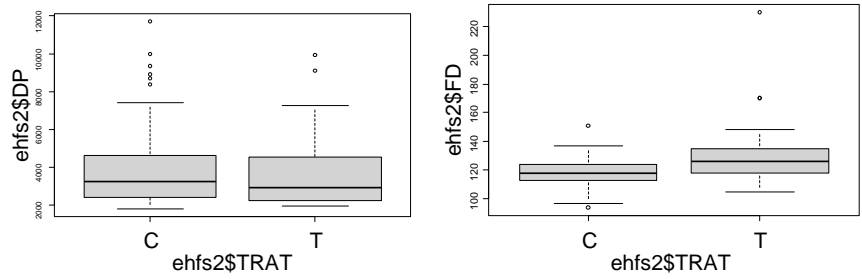

# Euschistus heros MS-1

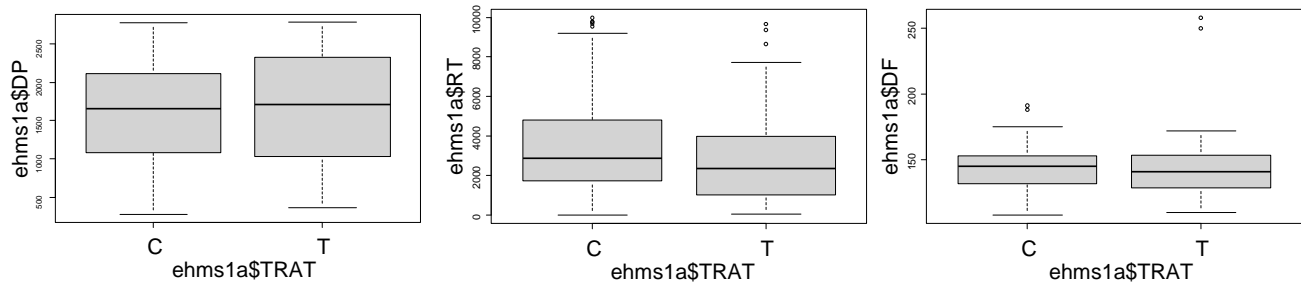

# Euschistus heros MS-2

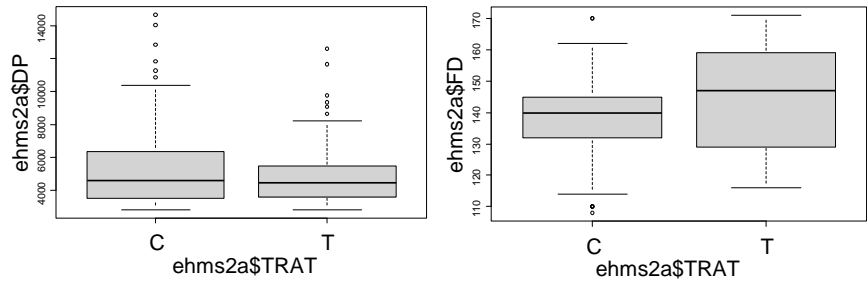

# Chinavia ubica FS-1a

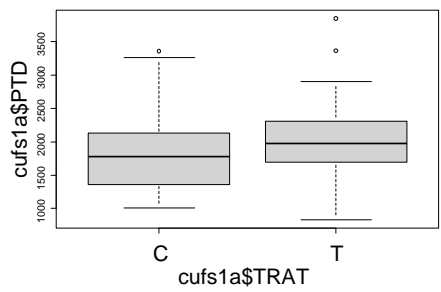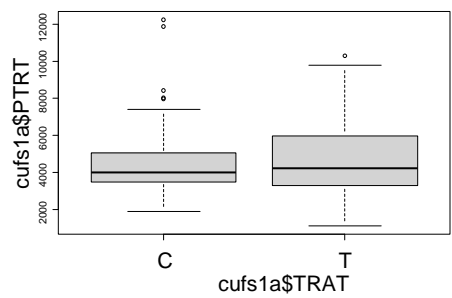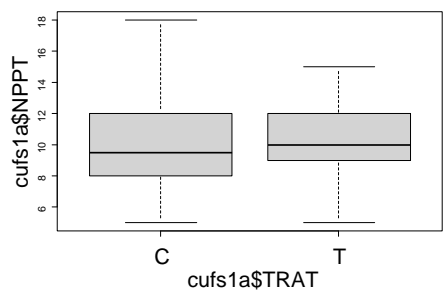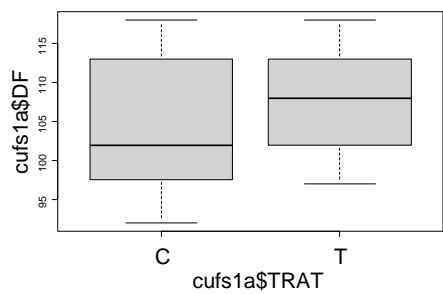

# Chinavia ubica FS-1b

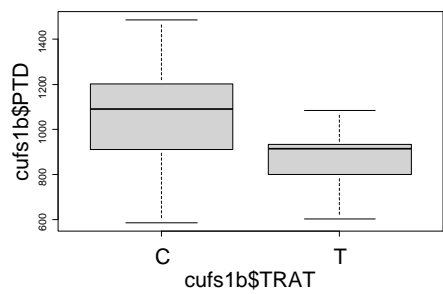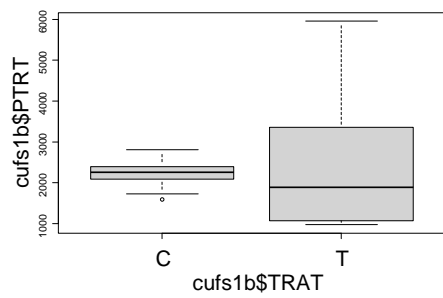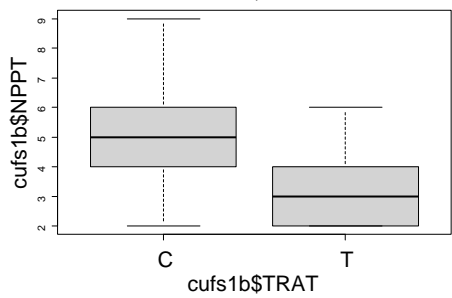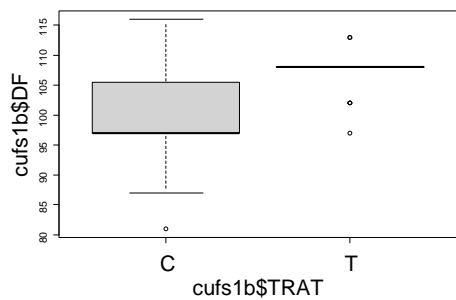

# Chinavia ubica MS-1

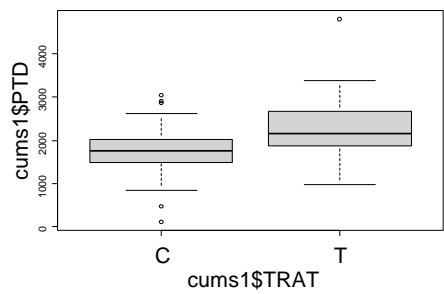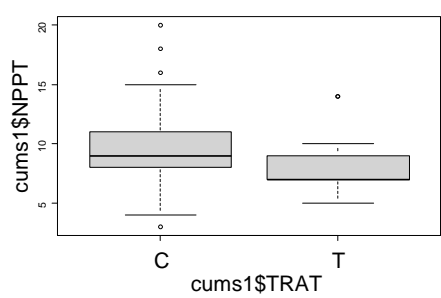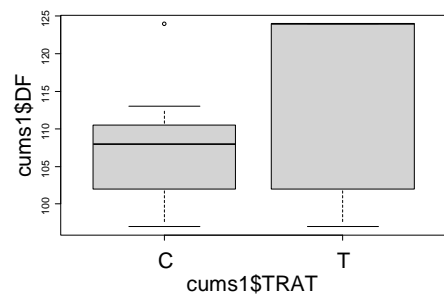

# Chinavia impicticornis FS-1a

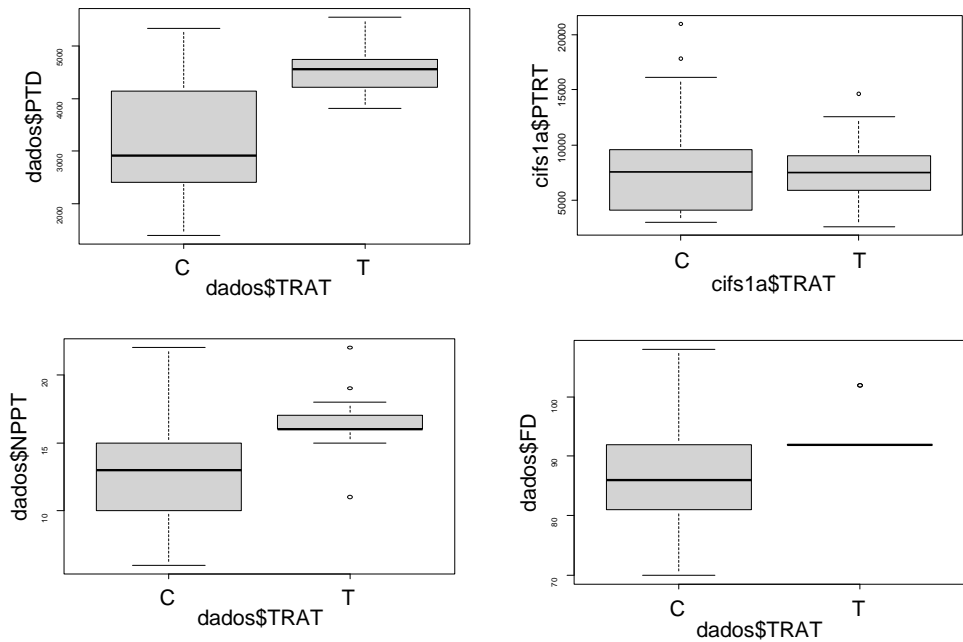

# Chinavia impicticornis FS-1b

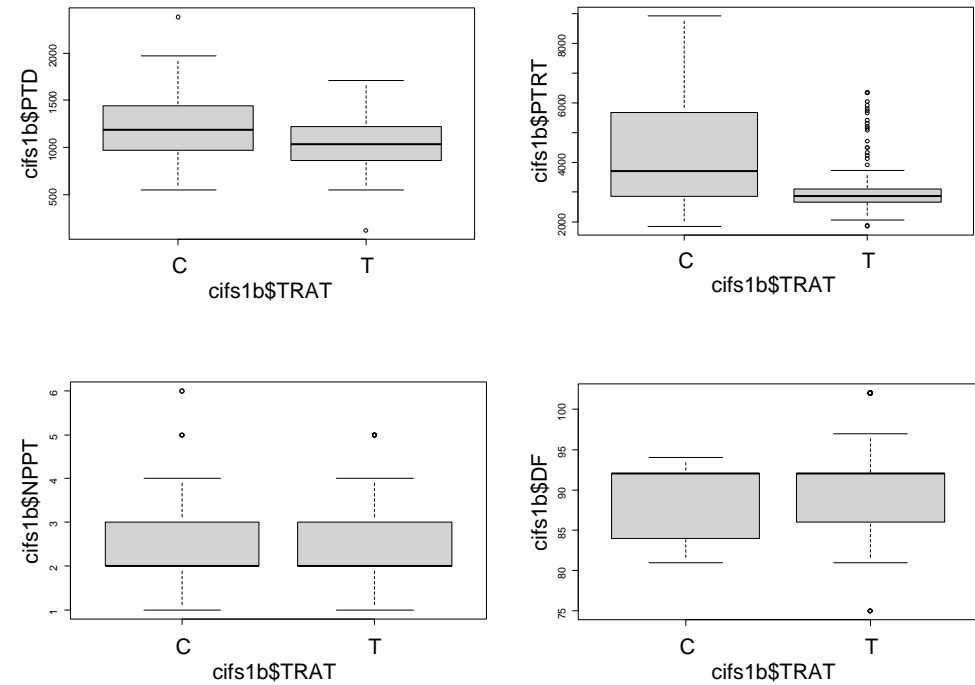

# Chinavia impicticornis MS-1

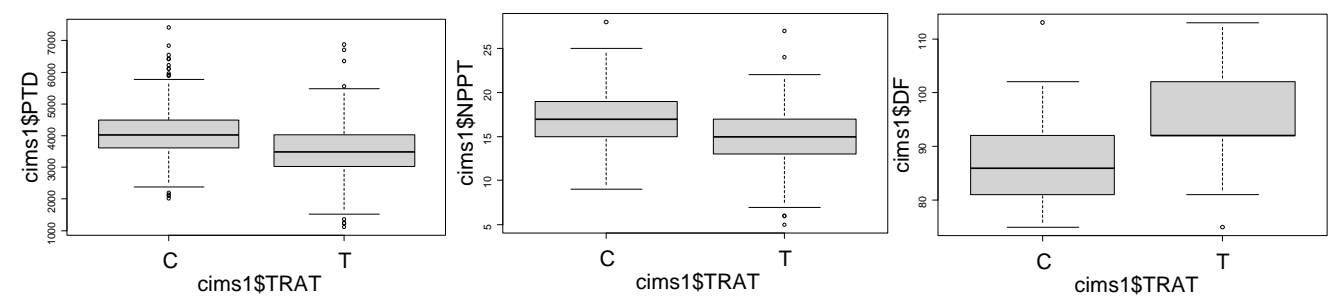

# Chinavia impicticornis MS-2

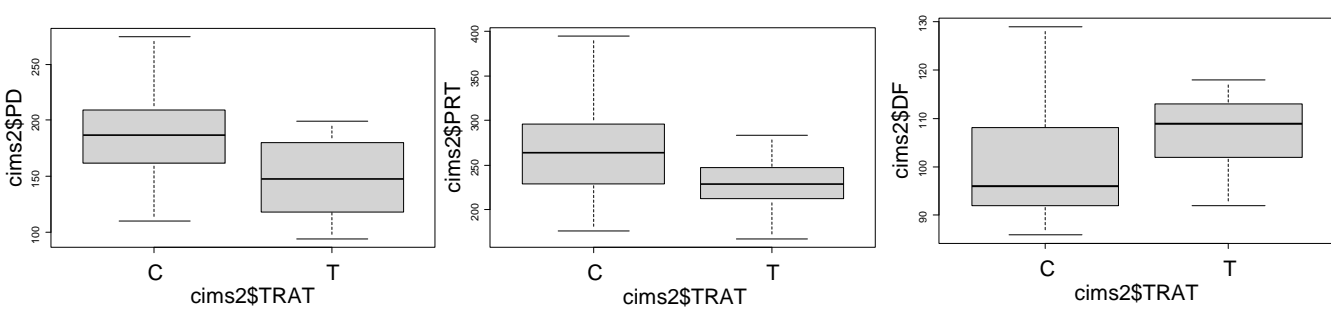



Eushcitus heros

Female

Latency

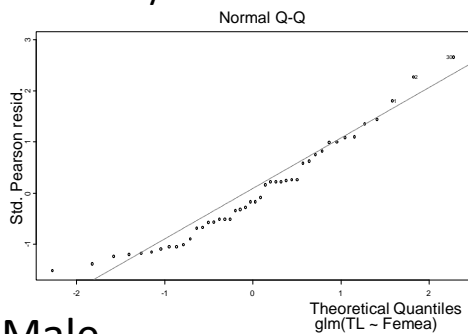

Response time

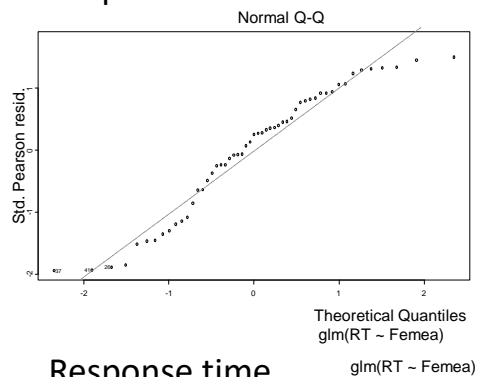

Male

Latency

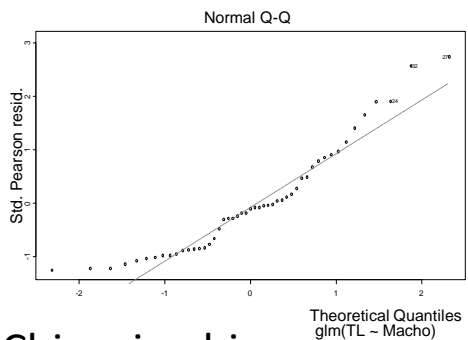

Response time

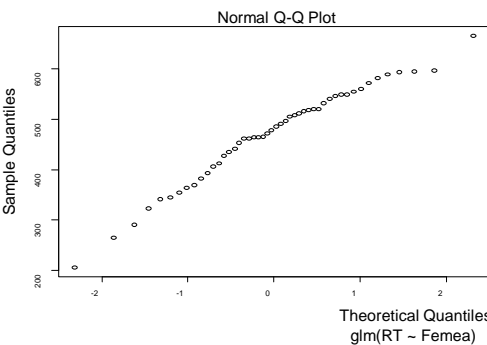

Chinavia ubica

Female

Latency

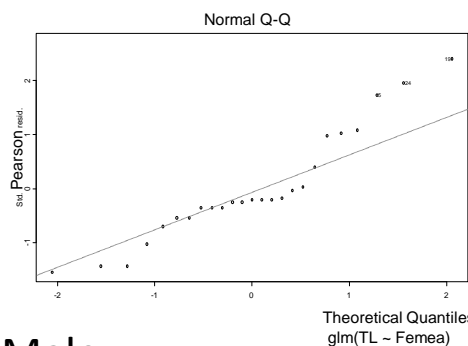

Response time

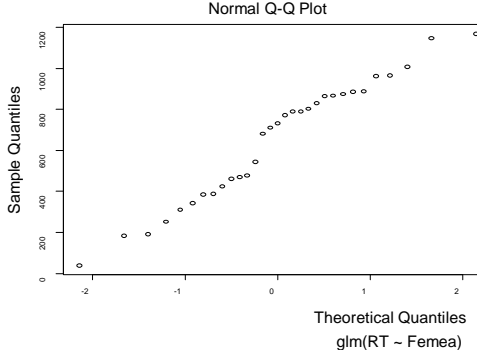

Male

Latency

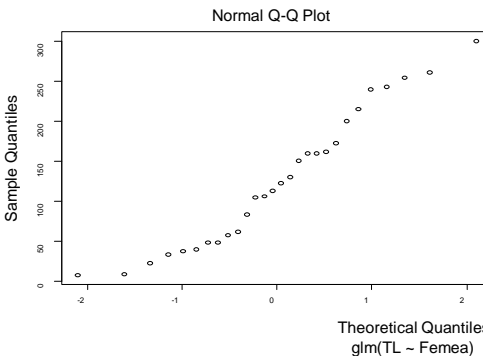

Response time

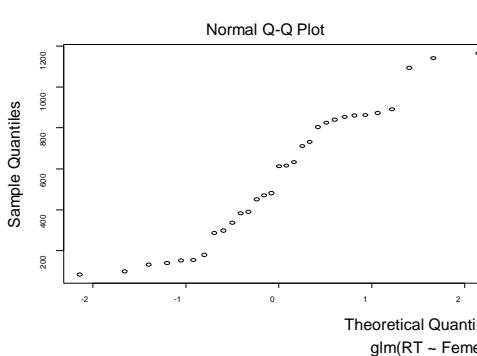

# Chinavia impicticornis

## Female

### Latency

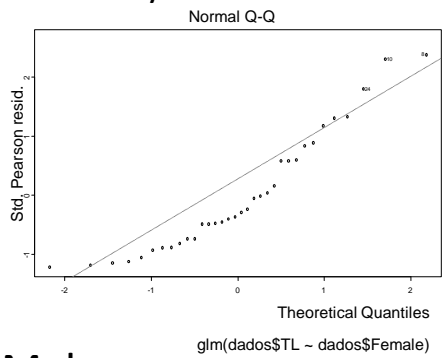

### Response time

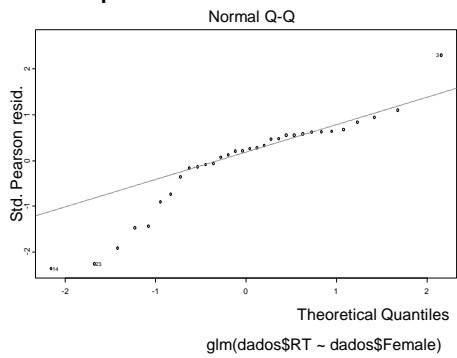

## Male

### Latency

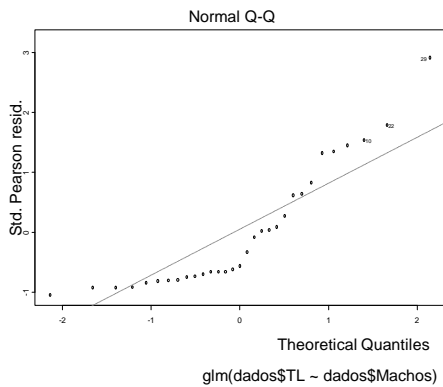

### Response time

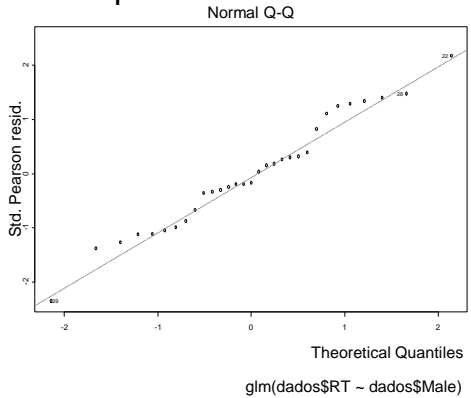

*Euschsitus heros* – FS-1

Pulse duration

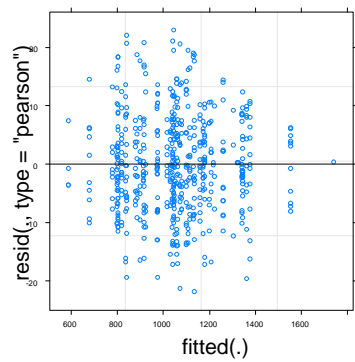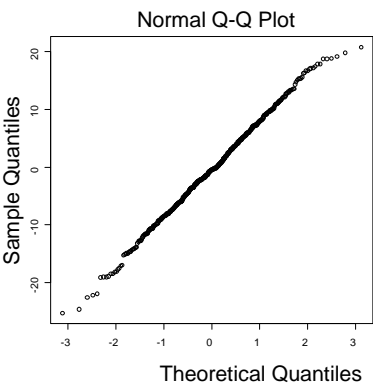

Repetition time

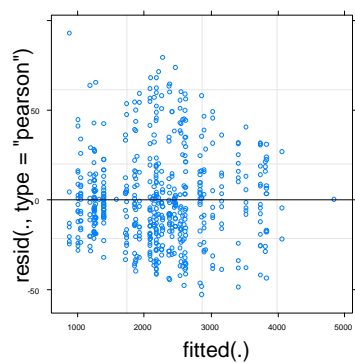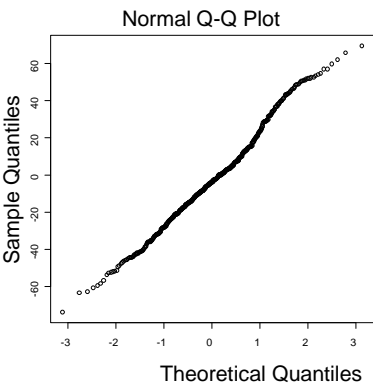

Dominant Frequency

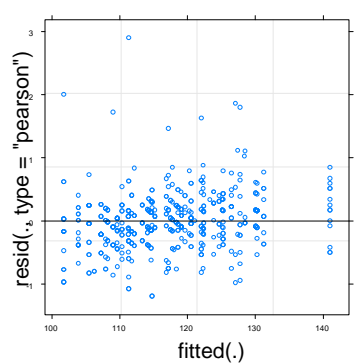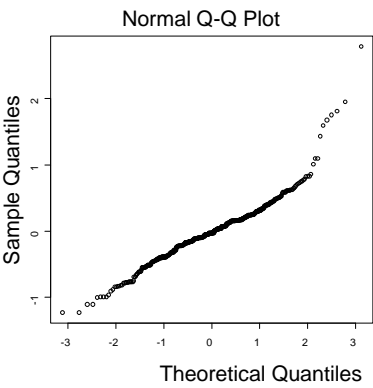

*Euschsitus heros* – FS-2

Pulse duration

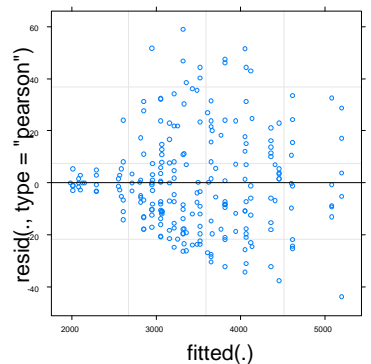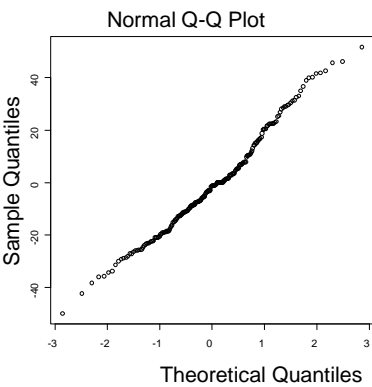

Dominant Frequency

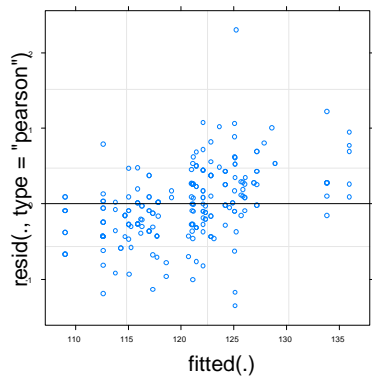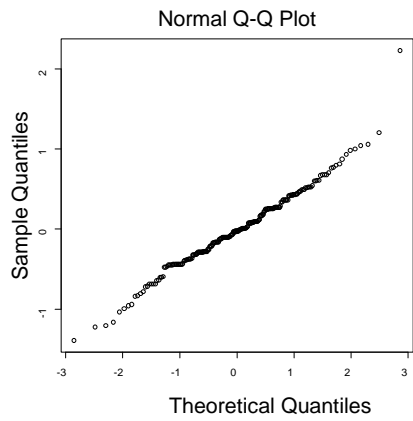

*Euschsitus heros* – MS-1

Pulse duration

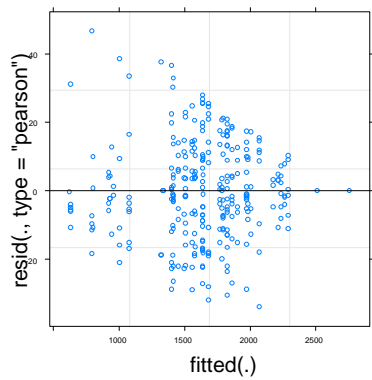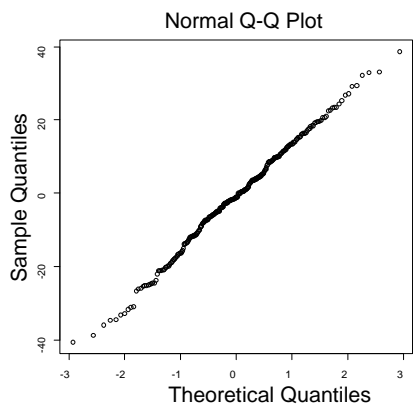

Repetition time

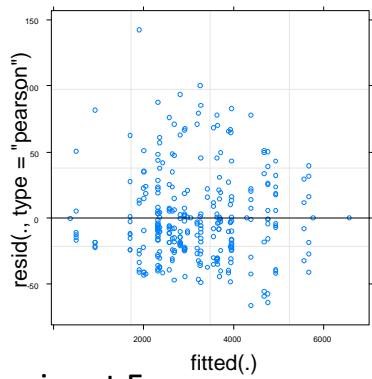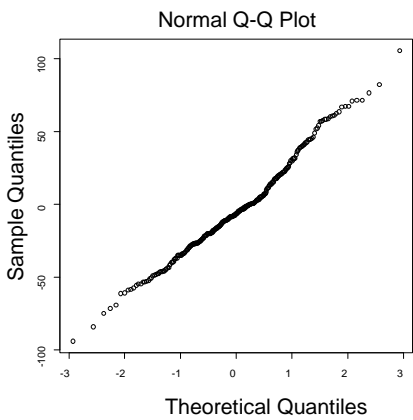

Dominant Frequency

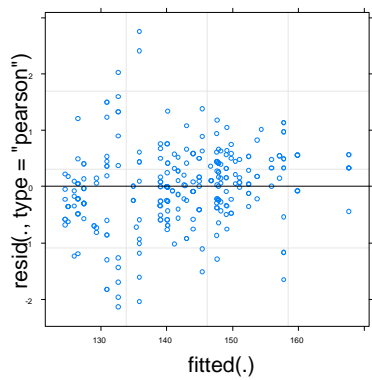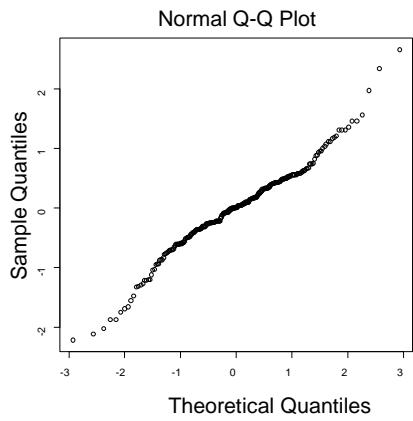

*Euschsitus heros* – MS-2

PD

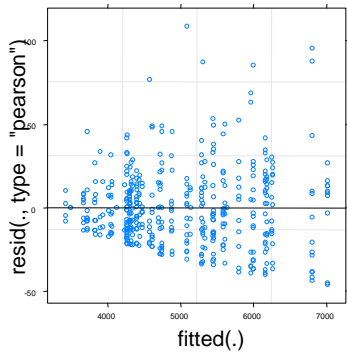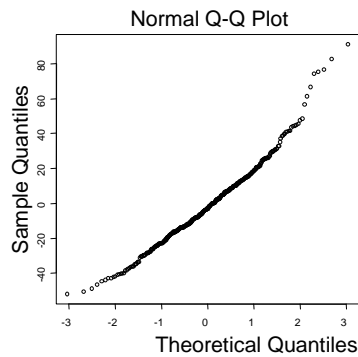

DF

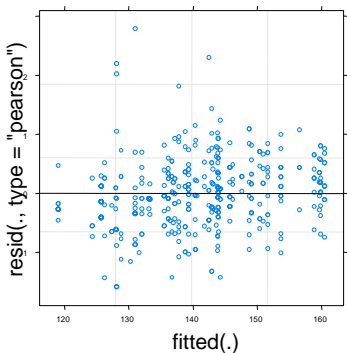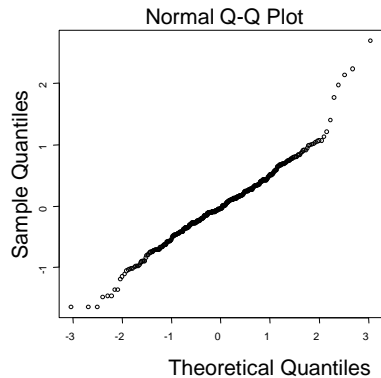

*Chinavia ubica* – FS-1a

PTD

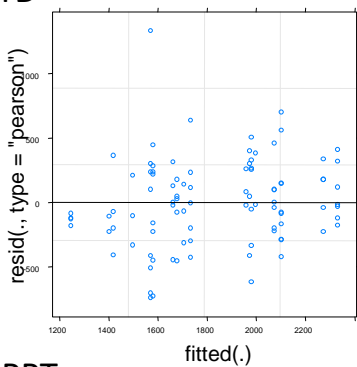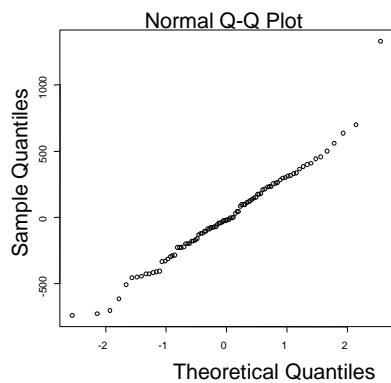

NPPT

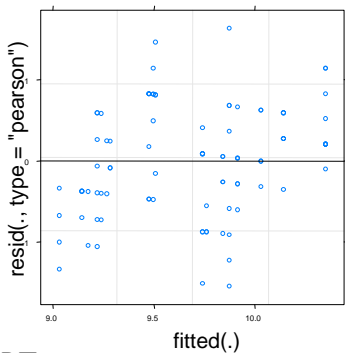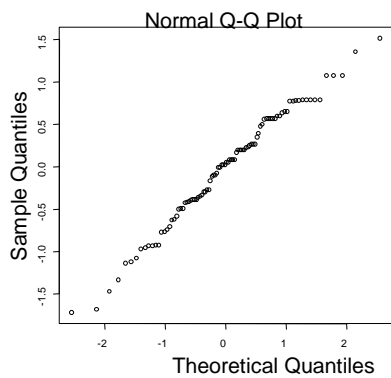

PTRT

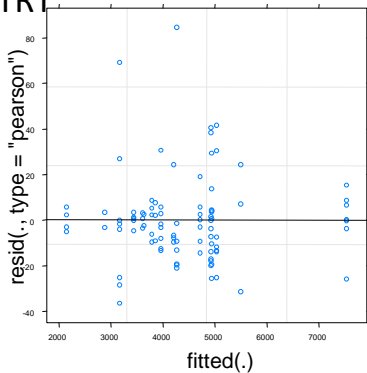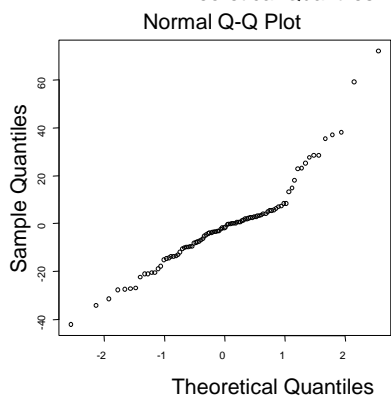

Dominant Frequency

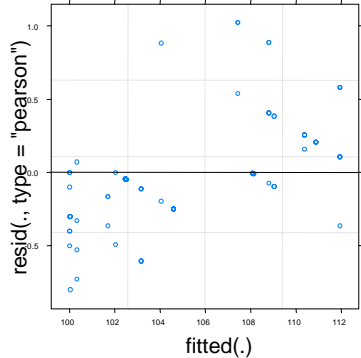

Normal Q-Q Plot

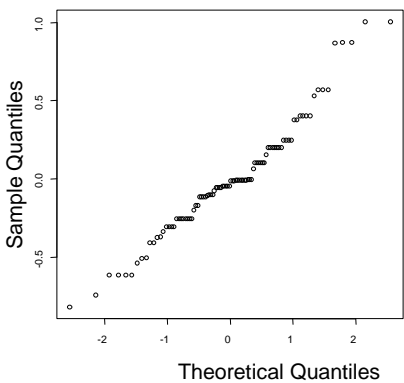

*Chinavia ubica* – FS-1b  
Pulse train duration

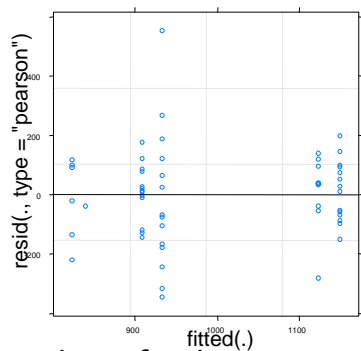

Normal Q-Q Plot

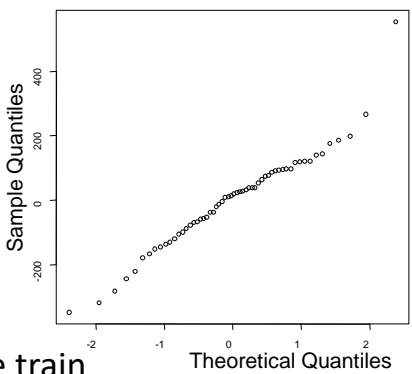

Number of pulses per pulse train

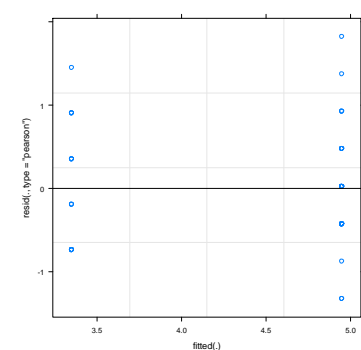

Normal Q-Q Plot

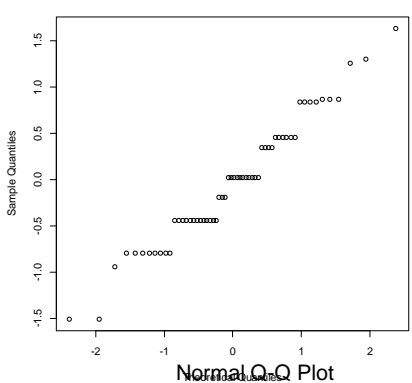

Pulse train repetition time

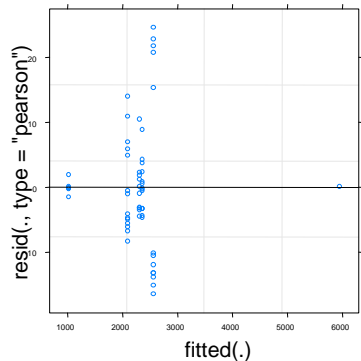

Normal Q-Q Plot

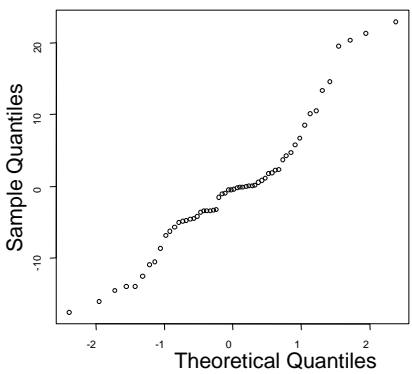

Dominant Frequency

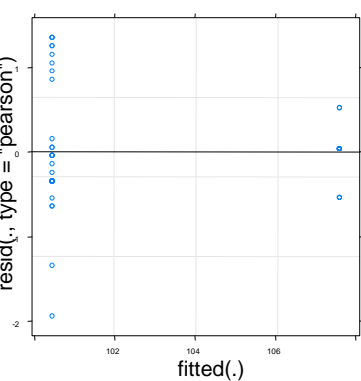

Normal Q-Q Plot

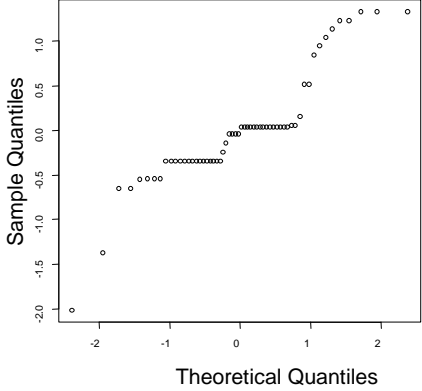

*Chinavia ubica* – MS-1  
Pulse train duration

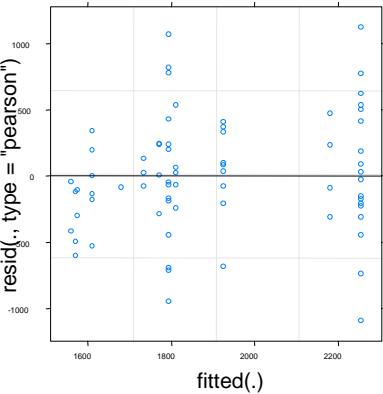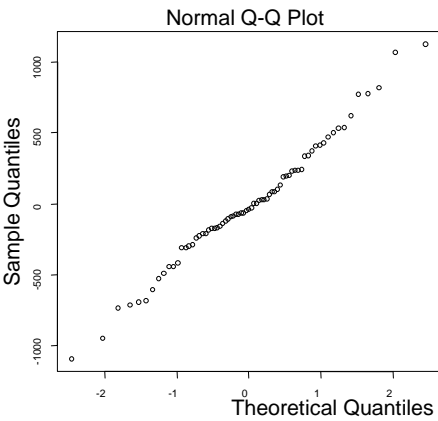

Number of pulses per pulse train

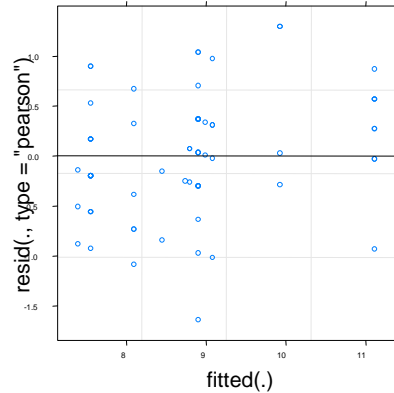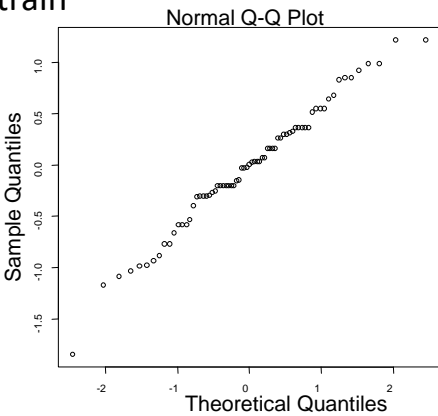

Dominant Frequency

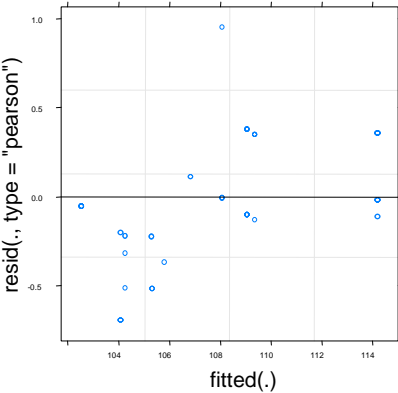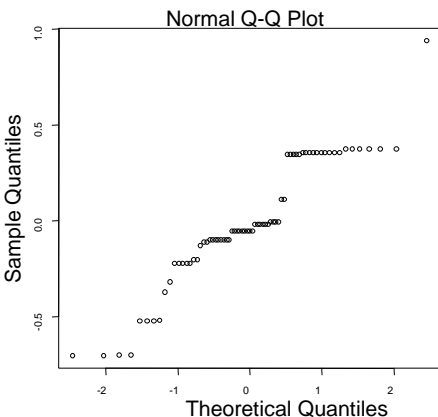

*Chinavia impicticornis* FS-1a  
Pulse train duration

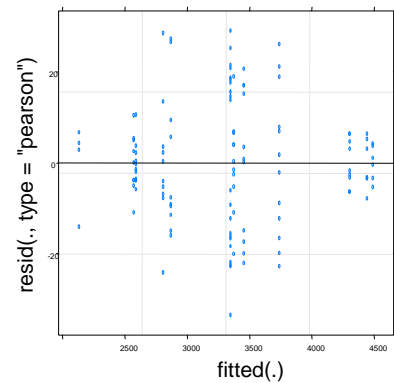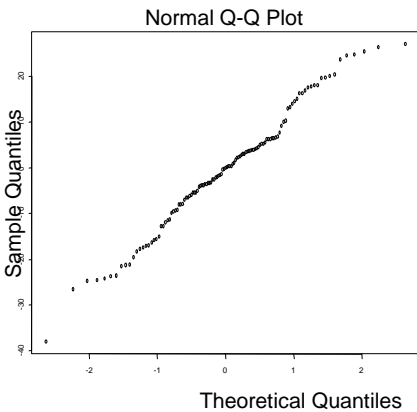

Number of pulses per pulse train

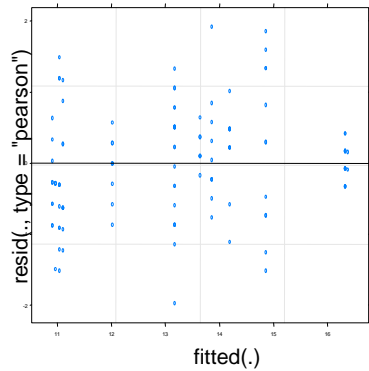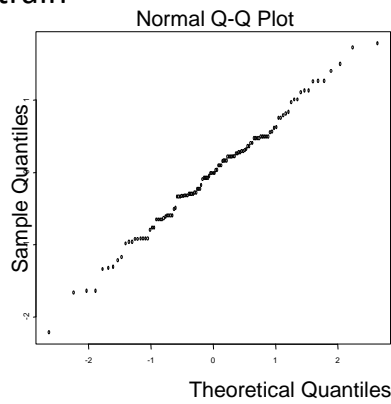

Pulse train repetition time

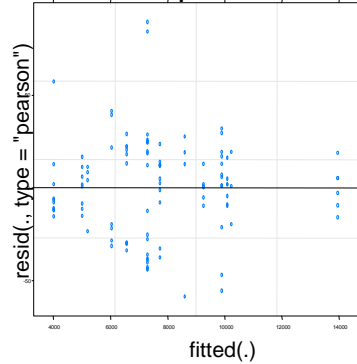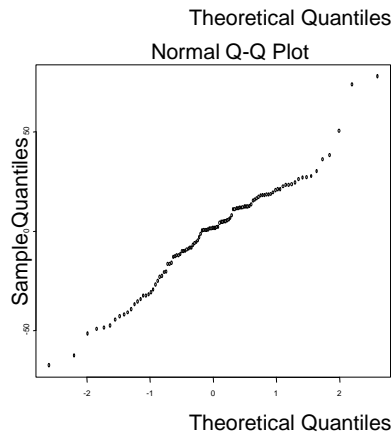

Dominant Frequency

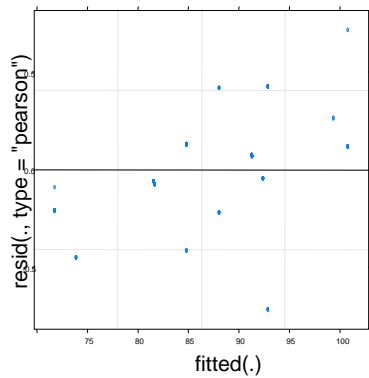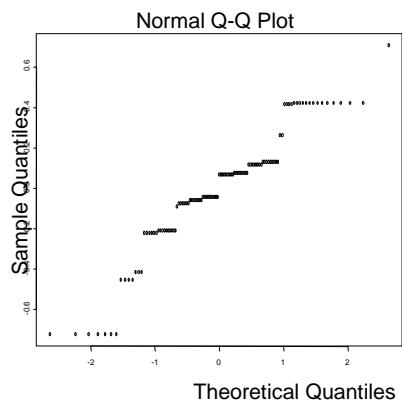

*Chinavia impicticornis* FS-1b

Pulse train duration

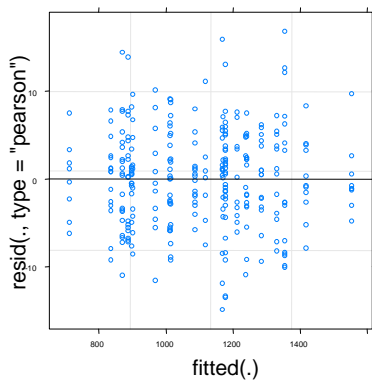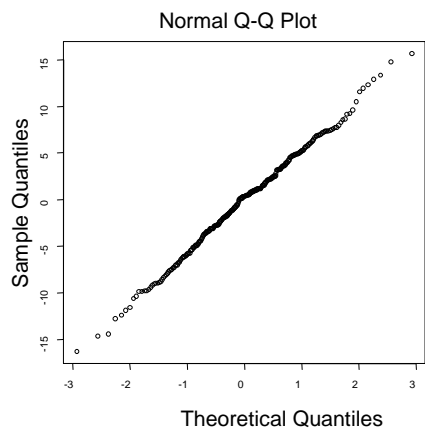



# Number of pulses per pulse train

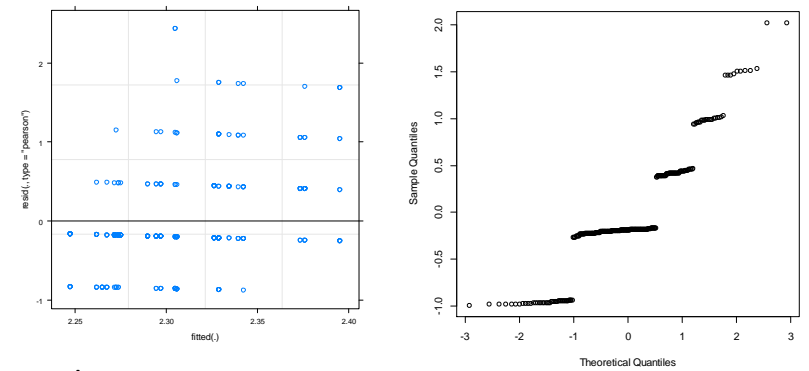

# Pulse train repetition time

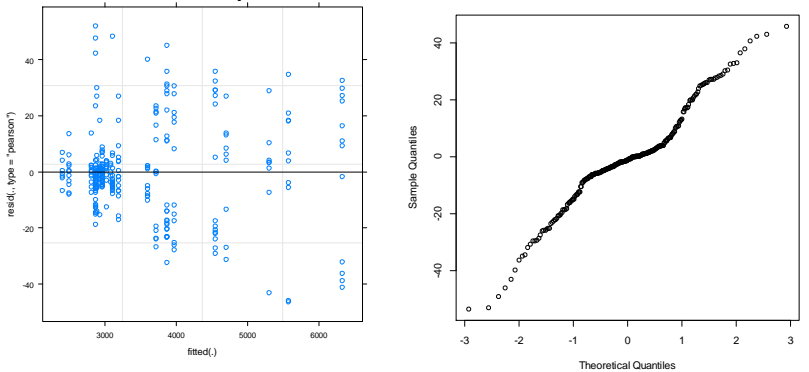

# Dominant Frequency

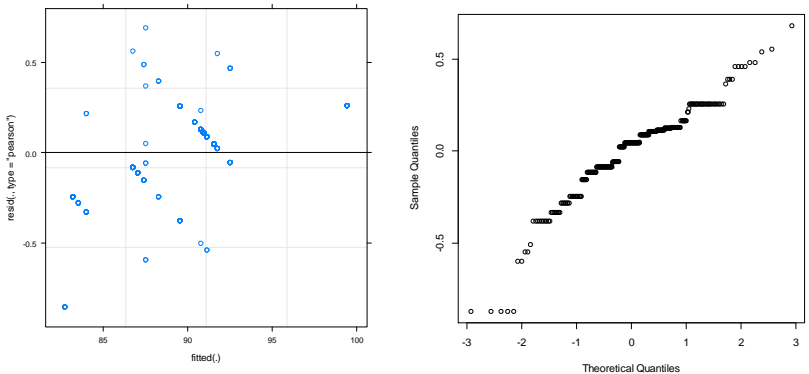

# Chinavia impicticornis MS-1

## Pulse train duration

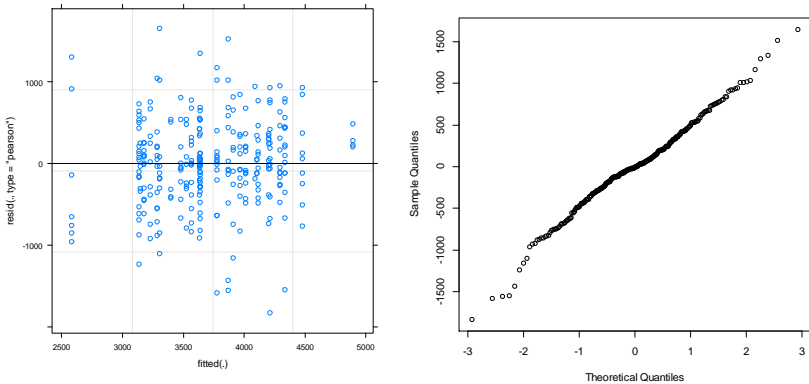

## Number of pulses per pulse train

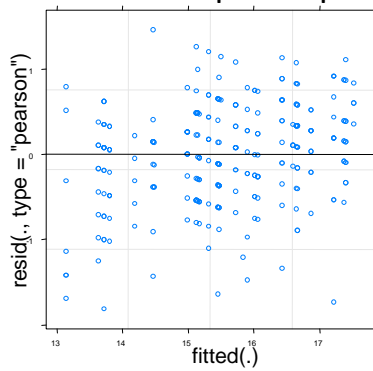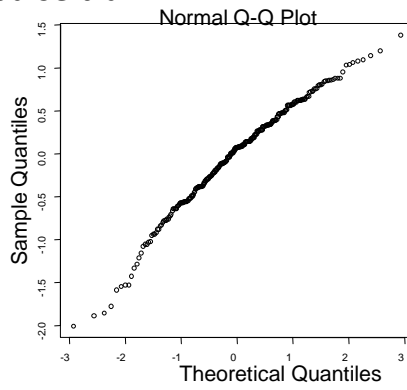

## Dominant Frequency

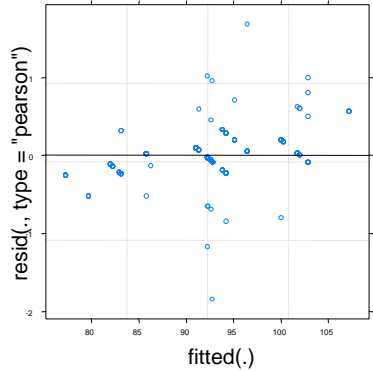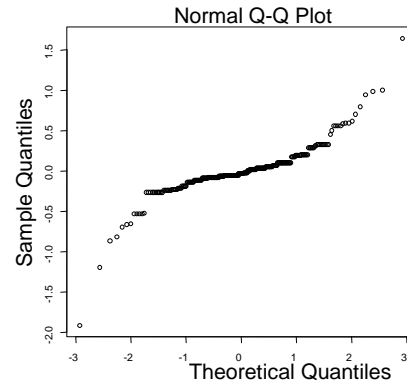

## *Chinavia impicticrnis* MS-2 Pulse duration

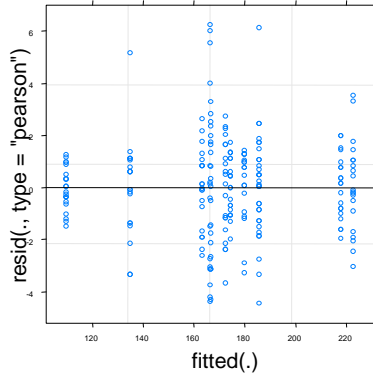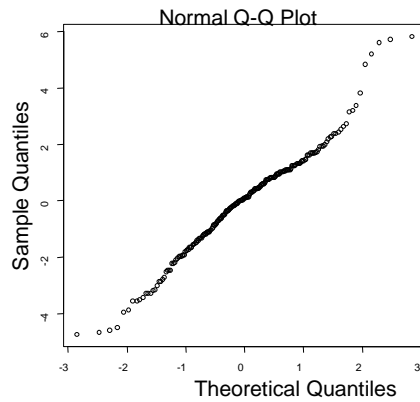

## Pulse train repetition time

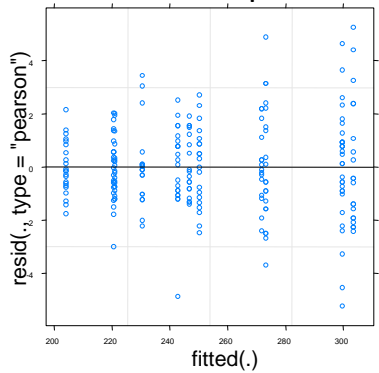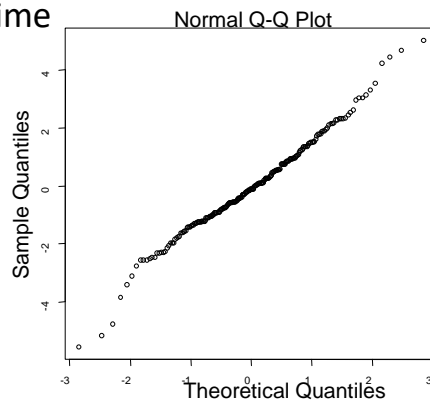

## Dominant Frequency

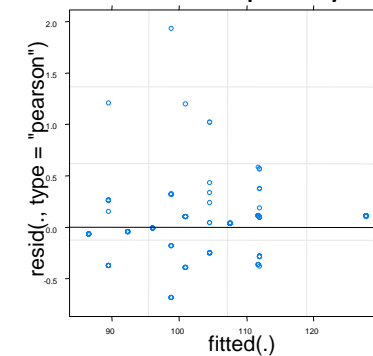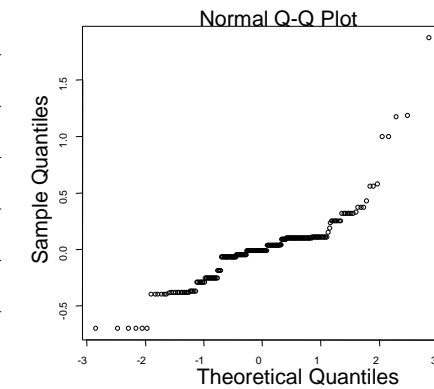

Supplement: s1 [file s1]
