# Supplementary material for: Inhibitory Copulation Effect of Vibrational Rival Female Signals of Three Stink Bug Species as a Tool for Mating Disruption
Source: MDPI journal article supplement (doi:10.3390/insects12020177), 2021-02-18
Supplement: s1 [file s1]

## **Supplementary material S1**

### **Inhibitory copulation effect of vibrational rival female signals of three stink bug species as a tool for mating disruption**

Aline Moreira Dias, Miguel Borges, Maria Carolina Blassioli Moraes, Matheus Lorrán Figueira Coelho, Andrej Čokl, Raul Alberto Laumann

*Statistical analyses scripts and results*

## ***Euschistus heros***

### ***Proportion of Responses***

```
> analyse=glm(Ehresp~Eh, family=binomial)
> summary(analise)
```

Call:

```
glm(formula = Ehresp ~ Eh, family = binomial)
```

Deviance Residuals:

| Min     | 1Q     | Median | 3Q     | Max    |
|---------|--------|--------|--------|--------|
| -2.6081 | 0.2604 | 0.2604 | 0.4590 | 0.4590 |

Coefficients:

|             | Estimate | Std. Error | z value | Pr(> z )     |
|-------------|----------|------------|---------|--------------|
| (Intercept) | 3.367    | 1.017      | 3.311   | 0.000931 *** |
| EhEht       | -1.170   | 1.185      | -0.987  | 0.323554     |

(Dispersion parameter for binomial family taken to be 1)

Null deviance: 29.392 on 59 degrees of freedom

Residual deviance: 28.274 on 58 degrees of freedom

AIC: 32.274

Number of Fisher Scoring iterations: 6

```
> anova(analise, test="Chi")
```

Analysis of Deviance Table

Model: binomial, link: logit

Response: Ehresp

Terms added sequentially (first to last)

|      | Df | Deviance | Resid. Df | Resid. Dev | Pr(>Chi) |
|------|----|----------|-----------|------------|----------|
| NULL |    |          | 59        | 29.392     |          |
| Eh   | 1  | 1.1179   | 58        | 28.274     | 0.2904   |

```
> odd.ratio = exp(coef(analise));odd.ratio
```

| (Intercept) | EhEht     |
|-------------|-----------|
| 29.0000000  | 0.3103448 |

```
> ICbeta1=confint.default(analise,level=0.95);ICbeta1
```

|             | 2.5 %    | 97.5 %   |
|-------------|----------|----------|
| (Intercept) | 1.373827 | 5.360765 |

|       |           |          |
|-------|-----------|----------|
| EhEht | -3.493147 | 1.153004 |
|-------|-----------|----------|

```
> ICOR1=exp(ICbeta1);ICOR1
```

|             | 2.5 %      | 97.5 %     |
|-------------|------------|------------|
| (Intercept) | 3.95044019 | 212.887668 |
| EhEht       | 0.03040504 | 3.167696   |

### **Female**

#### ***Latency***

```
> dados=read.table("tlehf.txt", h=T)
```

```
> shapiro.test(TL)
```

Shapiro-Wilk normality test

data: TL

W = 0.94521, p-value = 0.0366

```
> analyse=glm(TL~Femea, family=quasipoisson)
> summary(analise)
Call:
glm(formula = TL ~ Femea, family = quasipoisson)
Deviance Residuals:
    Min       1Q   Median       3Q      Max
-11.8817  -4.6255  -0.9545   3.4977  12.2313

Coefficients:
            Estimate Std. Error t value Pr(>|t|)
(Intercept)    4.3296    0.1355  31.960  <2e-16 ***
FemeaTreatment -0.1146    0.2075  -0.552   0.584
(Dispersion parameter for quasipoisson family taken to be 33.43867)
Null deviance: 1473.9 on 43 degrees of freedom
Residual deviance: 1463.6 on 42 degrees of freedom
AIC: NA
Number of Fisher Scoring iterations: 5
```

### ***Response time***

```
> dados=read.table("tcehf.txt", h=T)
> shapiro.test(RT)

      Shapiro-Wilk normality test
data:  RT
W = 0.93607, p-value = 0.007062

> analyse=glm(RT~Femea, family=quasipoisson)
> summary(analise)
Call:
glm(formula = RT ~ Femea, family = quasipoisson)

Deviance Residuals:
    Min       1Q   Median       3Q      Max
-19.536  -5.453   2.033   6.390  11.114

Coefficients:
            Estimate Std. Error t value Pr(>|t|)
(Intercept)    5.91917    0.07957  74.391  <2e-16 ***
FemeaTreatment -0.03864    0.11951  -0.323   0.748
(Dispersion parameter for quasipoisson family taken to be 68.31945)
Null deviance: 4063.2 on 52 degrees of freedom
Residual deviance: 4056.1 on 51 degrees of freedom
AIC: NA
Number of Fisher Scoring iterations: 4
```

### **Male**

#### ***Latency***

```
> dados=read.table("tlehm.txt", h=T)
> shapiro.test(TL)

      Shapiro-Wilk normality test
data:  TL
W = 0.86322, p-value = 4.228e-05

> analyse=glm(TL~Macho, family=quasipoisson)
> summary(analise)

Call:
glm(formula = TL ~ Macho, family = quasipoisson)
```

Deviance Residuals:

| Min      | 1Q      | Median  | 3Q     | Max     |
|----------|---------|---------|--------|---------|
| -11.5671 | -7.0145 | -0.7657 | 3.1020 | 14.8913 |

Coefficients:

|                | Estimate | Std. Error | t value | Pr(> t )   |
|----------------|----------|------------|---------|------------|
| (Intercept)    | 3.9961   | 0.1848     | 21.627  | <2e-16 *** |
| MachoTreatment | 0.3827   | 0.2459     | 1.556   | 0.126      |

(Dispersion parameter for quasipoisson family taken to be 48.27374)

Null deviance: 2415.7 on 48 degrees of freedom

Residual deviance: 2297.5 on 47 degrees of freedom

AIC: NA

### ***Response time***

```
> shapiro.test(TC)
```

Shapiro-Wilk normality test

data: TC

W = 0.97067, p-value = 0.2689

```
> t.test(TC~Macho)
```

Welch Two Sample t-test

data: TC by Macho

t = -0.041954, df = 45.185, p-value = 0.9667

alternative hypothesis: true difference in means is not equal to 0

95 percent confidence interval:

-57.55812 55.20892

sample estimates:

mean in group Control mean in group Treatment

470.1111 471.2857

### ***Proportion of couple formation***

```
> res = prop.test(x = c(23, 3), n = c(29, 27))
```

```
> res
```

2-sample test for equality of proportions with continuity correction

data: c(23, 3) out of c(29, 27)

X-squared = 23.476, df = 1, p-value = 1.265e-06

alternative hypothesis: two.sided

95 percent confidence interval:

0.4570551 0.9069296

sample estimates:

prop 1 prop 2

0.7931034 0.1111111

### ***Proportion of copulation***

```
> analyse=glm(Ehcop~Eh, family=binomial)
```

```
> summary(analyse)
```

Call:

```
glm(formula = Ehcop ~ Eh, family = binomial)
```

Deviance Residuals:

| Min    | 1Q     | Median | 3Q    | Max   |
|--------|--------|--------|-------|-------|
| -1.706 | -0.459 | -0.459 | 0.729 | 2.146 |

Coefficients:

|             | Estimate | Std. Error | z value | Pr(> z )     |
|-------------|----------|------------|---------|--------------|
| (Intercept) | 1.1896   | 0.4317     | 2.756   | 0.00585 **   |
| EhEht       | -3.3868  | 0.7461     | -4.539  | 5.64e-06 *** |

(Dispersion parameter for binomial family taken to be 1)  
Null deviance: 82.108 on 59 degrees of freedom  
Residual deviance: 52.101 on 58 degrees of freedom  
AIC: 56.101

Number of Fisher Scoring iterations: 4

```
> anova(analise, test="Chi")
Analysis of Deviance Table
Model: binomial, link: logit
Response: Ehcop
Terms added sequentially (first to last)
```

|      | Df | Deviance | Resid. | Df | Resid. Dev | Pr(>Chi)      |
|------|----|----------|--------|----|------------|---------------|
| NULL |    |          |        | 59 | 82.108     |               |
| Eh   | 1  | 30.006   |        | 58 | 52.101     | 4.306e-08 *** |

```
> odd.ratio = exp(coef(analise));odd.ratio
(Intercept)    EhEht
3.28571429 0.03381643
> ICbeta1=confint.default(analise,level=0.95);ICbeta1
          2.5 %      97.5 %
(Intercept) 0.3435352  2.035633
EhEht      -4.8491105 -1.924507
> ICOR1=exp(ICbeta1);ICOR1
          2.5 %      97.5 %
(Intercept) 1.409923154 7.6570970
EhEht      0.007835344 0.1459477
```

## Signals

### FS-1

```
> dados=read.table("eh.txt", h=T)
> attach(dados)
> names(dados)
[1] "trat" "FS1" "FS2" "MS1" "MS2"
> analise=glm(FS1~trat, family=binomial)
> summary(analise)
```

Call:

```
glm(formula = FS1 ~ trat, family = binomial)
```

Deviance Residuals:

| Min     | 1Q     | Median | 3Q     | Max    |
|---------|--------|--------|--------|--------|
| -2.6081 | 0.2604 | 0.2604 | 0.7290 | 0.7290 |

Coefficients:

|             | Estimate | Std. Error | z value | Pr(> z )     |
|-------------|----------|------------|---------|--------------|
| (Intercept) | 3.367    | 1.017      | 3.311   | 0.000931 *** |
| tratT       | -2.178   | 1.105      | -1.971  | 0.048730 *   |

(Dispersion parameter for binomial family taken to be 1)

Null deviance: 47.121 on 59 degrees of freedom

Residual deviance: 41.365 on 58 degrees of freedom  
AIC: 45.365

Number of Fisher Scoring iterations: 6

```
> anova(analise, test="Chi")  
Analysis of Deviance Table
```

Model: binomial, link: logit  
Response: FS1  
Terms added sequentially (first to last)

|      | Df | Deviance | Resid. | Df | Resid. Dev | Pr(>Chi)  |
|------|----|----------|--------|----|------------|-----------|
| NULL |    |          |        | 59 | 47.121     |           |
| trat | 1  | 5.7559   |        | 58 | 41.365     | 0.01643 * |

```
> odd.ratio = exp(coef(analise));odd.ratio  
(Intercept)    tratT  
29.0000000  0.1133005  
> ICbeta1=confint.default(analise,level=0.95);ICbeta1  
      2.5 %      97.5 %  
(Intercept) 1.373827 5.36076465  
tratT      -4.343287 -0.01213616  
> ICOR1=exp(ICbeta1);ICOR1  
      2.5 %      97.5 %  
(Intercept) 3.95044019 212.8876683  
tratT      0.01299374  0.9879372
```

## FS-2

```
> analise=glm(FS2~trat, family=binomial)  
> summary(analise)
```

Call:  
glm(formula = FS2 ~ trat, family = binomial)  
Deviance Residuals:  
 Min 1Q Median 3Q Max  
-2.6081 0.2604 0.2604 0.7876 0.7876

Coefficients:  

|             | Estimate | Std. Error | z value | Pr(> z )     |
|-------------|----------|------------|---------|--------------|
| (Intercept) | 3.367    | 1.017      | 3.311   | 0.000931 *** |
| tratT       | -2.356   | 1.098      | -2.146  | 0.031870 *   |

(Dispersion parameter for binomial family taken to be 1)  
Null deviance: 50.725 on 59 degrees of freedom  
Residual deviance: 43.564 on 58 degrees of freedom  
AIC: 47.564

Number of Fisher Scoring iterations: 6  
> anova(analise, test="Chi")  
Analysis of Deviance Table

Model: binomial, link: logit

Response: FS2

Terms added sequentially (first to last)

|      | Df | Deviance | Resid. | Df | Resid. Dev | Pr(>Chi) |
|------|----|----------|--------|----|------------|----------|
| NULL |    |          |        | 59 | 50.725     |          |

```
trat      1  7.1615      58  43.564  0.007449 **
```

```
> odd.ratio = exp(coef(analise));odd.ratio
(Intercept)   tratT
29.00000000  0.09482759
> ICbeta1=confint.default(analise,level=0.95);ICbeta1
      2.5 %   97.5 %
(Intercept) 1.373827 5.3607646
tratT      -4.507139 -0.2042507
> ICOR1=exp(ICbeta1);ICOR1
      2.5 %   97.5 %
(Intercept) 3.95044019 212.8876683
tratT      0.01102997  0.8152579
```

### **MS-1**

```
> analise=glm(MS1~trat, family=binomial)
> summary(analise)
```

Call:

```
glm(formula = MS1 ~ trat, family = binomial)
```

Deviance Residuals:

| Min     | 1Q     | Median | 3Q     | Max    |
|---------|--------|--------|--------|--------|
| -2.3272 | 0.3715 | 0.3715 | 1.0108 | 1.0108 |

Coefficients:

|             | Estimate | Std. Error | z value | Pr(> z )     |
|-------------|----------|------------|---------|--------------|
| (Intercept) | 2.6391   | 0.7319     | 3.606   | 0.000311 *** |
| tratT       | -2.2336  | 0.8213     | -2.719  | 0.006539 **  |

(Dispersion parameter for binomial family taken to be 1)

Null deviance: 65.193 on 59 degrees of freedom  
Residual deviance: 55.077 on 58 degrees of freedom  
AIC: 59.077

Number of Fisher Scoring iterations: 5

```
> anova(analise, test="Chi")
Analysis of Deviance Table
```

Model: binomial, link: logit

Response: MS1

Terms added sequentially (first to last)

|      | Df | Deviance | Resid. | Df | Resid. Dev | Pr(>Chi)   |
|------|----|----------|--------|----|------------|------------|
| NULL |    |          |        | 59 | 65.193     |            |
| trat | 1  | 10.116   |        | 58 | 55.077     | 0.00147 ** |

```
> odd.ratio = exp(coef(analise));odd.ratio
(Intercept)   tratT
14.00000000  0.1071429
> ICbeta1=confint.default(analise,level=0.95);ICbeta1
      2.5 %   97.5 %
(Intercept) 1.204515 4.073599
tratT      -3.843389 -0.623795
> ICOR1=exp(ICbeta1);ICOR1
      2.5 %   97.5 %
(Intercept) 3.33514195 58.7681133
tratT      0.02142087  0.5359068
```

## MS-2

```
> analyse=glm(MS2~trat, family=binomial)
> summary(analise)
```

Call:

```
glm(formula = MS2 ~ trat, family = binomial)
```

Deviance Residuals:

| Min    | 1Q    | Median | 3Q    | Max   |
|--------|-------|--------|-------|-------|
| -2.146 | 0.459 | 0.459  | 0.729 | 0.729 |

Coefficients:

|             | Estimate | Std. Error | z value | Pr(> z )     |
|-------------|----------|------------|---------|--------------|
| (Intercept) | 2.1972   | 0.6085     | 3.611   | 0.000305 *** |
| tratT       | -1.0076  | 0.7461     | -1.351  | 0.176834     |

(Dispersion parameter for binomial family taken to be 1)

Null deviance: 54.067 on 59 degrees of freedom

Residual deviance: 52.101 on 58 degrees of freedom

AIC: 56.101

Number of Fisher Scoring iterations: 4

```
> anova(analise, test="Chi")
```

Analysis of Deviance Table

Model: binomial, link: logit

Response: MS2

Terms added sequentially (first to last)

|      | Df | Deviance | Resid. | Df | Resid. Dev | Pr(>Chi) |
|------|----|----------|--------|----|------------|----------|
| NULL |    |          |        | 59 | 54.067     |          |
| trat | 1  | 1.966    |        | 58 | 52.101     | 0.1609   |

```
> odd.ratio = exp(coef(analise));odd.ratio
(Intercept)    tratT
 8.9999998    0.3650794
> ICbeta1=confint.default(analise,level=0.95);ICbeta1
      2.5 %    97.5 %
(Intercept) 1.004527 3.3899224
tratT       -2.469942 0.4546614
> ICOR1=exp(ICbeta1);ICOR1
      2.5 %    97.5 %
(Intercept) 2.73061474 29.66365
tratT       0.08458974 1.57564
```

## ***Chinavia ubica***

### ***Proportion of response***

```
> analyse=glm(Curesp~Cu, family=binomial)
```

```
> summary(analise)
```

Call:

```
glm(formula = Curesp ~ Cu, family = binomial)
```

Deviance Residuals:

| Min     | 1Q      | Median | 3Q     | Max    |
|---------|---------|--------|--------|--------|
| -1.5829 | -1.3537 | 0.8203 | 0.8679 | 1.0108 |



Coefficients:

```
      Estimate Std. Error z value Pr(>|z|)
(Intercept)  0.9163    0.4183   2.190  0.0285 *
CuCut       -0.5108    0.6191  -0.825  0.4093
(Dispersion parameter for binomial family taken to be 1)
Null deviance: 61.105 on 47 degrees of freedom
Residual deviance: 60.424 on 46 degrees of freedom
AIC: 64.424
```

Number of Fisher Scoring iterations: 4

```
> anova(analise, test="Chi")
Analysis of Deviance Table
Model: binomial, link: logit
Response: Curesp
Terms added sequentially (first to last)
```

```
      Df Deviance Resid. Df  Resid. Dev  Pr(>Chi)
NULL                47    61.105
Cu           1      0.6818    46    60.424    0.409
> odd.ratio = exp(coef(analise));odd.ratio
(Intercept)    CuCut
      2.5      0.6
> ICbeta1=confint.default(analise,level=0.95);ICbeta1
      2.5 %   97.5 %
(Intercept) 0.0963795 1.7362020
CuCut      -1.7243158 0.7026645
> ICOR1=exp(ICbeta1);ICOR1
      2.5 %   97.5 %
(Intercept) 1.101177  5.675746
CuCut       0.178295  2.019126
```

## Female

### *Latency*

```
> dados=read.table("tlcuf.txt", h=T)
> shapiro.test(TL)
```

```
      Shapiro-Wilk normality test
data:  TL
W = 0.78299, p-value = 0.0001198
```

```
> analise=glm(TL~Femea, family=quasipoisson)
> summary(analise)
```

Call:

```
glm(formula = TL ~ Femea, family = quasipoisson)
```

Deviance Residuals:

```
      Min      1Q  Median      3Q      Max
-10.229  -3.010  -1.110   1.929   10.182
```

Coefficients:

```
      Estimate Std. Error t value Pr(>|t|)
(Intercept)    3.3964    0.2584  13.146 3.5e-12 ***
FemeaTreatment  0.8598    0.3205   2.683  0.0133 *
```

(Dispersion parameter for quasipoisson family taken to be 27.89983)

```
Null deviance: 867.81 on 24 degrees of freedom
Residual deviance: 655.15 on 23 degrees of freedom
AIC: NA
```

Number of Fisher Scoring iterations: 5

### ***Response time***

```
> dados=read.table("tccuf.txt", h=T)
> shapiro.test(RT)
```

Shapiro-Wilk normality test

data: RT

W = 0.95747, p-value = 0.2497

```
> t.test(RT~Femea)
```

Welch Two Sample t-test

data: RT by Femea

t = 0.70938, df = 20.841, p-value = 0.486

alternative hypothesis: true difference in means is not equal to 0

95 percent confidence interval:

-157.9939 321.4676

sample estimates:

| mean in group Control | mean in group Treatment |
|-----------------------|-------------------------|
| 683.7368              | 602.0000                |

### **Males**

#### ***Latency***

```
> dados=read.table("tlcum.txt", h=T)
> attach(data)
> names(dados)
[1] "Machos" "TL"
> shapiro.test(TL)
```

Shapiro-Wilk normality test

data: TL

W = 0.9445, p-value = 0.1439

```
> t.test(TL~Machos)
```

Welch Two Sample t-test

data: TL by Machos

t = 1.2426, df = 19.744, p-value = 0.2286

alternative hypothesis: true difference in means is not equal to 0

95 percent confidence interval:

-28.27341 111.41780

sample estimates:

| mean in group Control | mean in group Treatment |
|-----------------------|-------------------------|
| 143.1176              | 101.5455                |

### ***Response time***

```
> dados=read.table("tccum.txt", h=T)
> shapiro.test(RT)
```

Shapiro-Wilk normality test

data: RT

W = 0.93658, p-value = 0.06638

```
> t.test(RT~Machos)
```

Welch Two Sample t-test

data: RT by Machos

t = 0.7539, df = 20.009, p-value = 0.4597

alternative hypothesis: true difference in means is not equal to 0

95 percent confidence interval:

-171.8785 366.4400

sample estimates:

mean in group Control mean in group Treatment

603.9474 506.6667

### ***Proportion of couple formation***

```
> res = prop.test(x = c(15, 4), n = c(20, 12))
```

```
> res
```

2-sample test for equality of proportions with continuity correction

data: c(15, 4) out of c(20, 12)

X-squared = 3.8089, df = 1, p-value = 0.05098

alternative hypothesis: two.sided

95 percent confidence interval:

0.0226595 0.8106738

sample estimates:

prop 1 prop 2

0.7500000 0.3333333

### ***Proportion of copulation***

```
> analyse=glm(Cucop~Cu, family=binomial)
```

```
> summary(analise)
```

Call:

```
glm(formula = Cucop ~ Cu, family = binomial)
```

Deviance Residuals:

Min 1Q Median 3Q Max

-1.2388 -1.2388 -0.6681 1.1173 1.7941

Coefficients:

Estimate Std. Error z value Pr(>|z|)

(Intercept) 0.1431 0.3789 0.378 0.7057

CuCut -1.5294 0.6753 -2.265 0.0235 \*

(Dispersion parameter for binomial family taken to be 1)

Null deviance: 64.443 on 47 degrees of freedom

Residual deviance: 58.689 on 46 degrees of freedom

AIC: 62.689

Number of Fisher Scoring iterations: 4

```
> anova(analise, test="Chi")
```

Analysis of Deviance Table

Model: binomial, link: logit

Response: Cucop

Terms added sequentially (first to last)

|      | Df | Deviance | Resid. | Df | Resid. Dev | Pr(>Chi)  |
|------|----|----------|--------|----|------------|-----------|
| NULL |    |          |        | 47 | 64.443     |           |
| Cu   | 1  | 5.7541   |        | 46 | 58.689     | 0.01645 * |

```
> odd.ratio = exp(coef(analise));odd.ratio
(Intercept)    CuCut
  1.1538462  0.2166667
> ICbeta1=confint.default(analise,level=0.95);ICbeta1
      2.5 %    97.5 %
(Intercept) -0.599593  0.8857946
CuCut       -2.853045 -0.2057452
> ICOR1=exp(ICbeta1);ICOR1
      2.5 %    97.5 %
(Intercept) 0.54903507  2.4249106
CuCut       0.05766844  0.8140405
```

## Signals

### FS-1a

```
> analise=glm(FS1a~trat, family=binomial)
> summary(analise)
```

Call:

```
glm(formula = FS1a ~ trat, family = binomial)
```

Deviance Residuals:

```
   Min      1Q  Median      3Q     Max
-1.046 -0.999 -0.999  1.315  1.367
```

Coefficients:

```
      Estimate Std. Error z value Pr(>|z|)
(Intercept) -0.4353    0.3870  -1.125   0.261
tratT        0.1169    0.6047   0.193   0.847
```

(Dispersion parameter for binomial family taken to be 1)

```
Null deviance: 63.422 on 46 degrees of freedom
Residual deviance: 63.384 on 45 degrees of freedom
AIC: 67.384
```

Number of Fisher Scoring iterations: 4

```
> anova(analise, test="Chi")
Analysis of Deviance Table
```

Model: binomial, link: logit

Response: FS1a

Terms added sequentially (first to last)

|      | Df | Deviance | Resid. | Df | Resid. Dev | Pr(>Chi) |
|------|----|----------|--------|----|------------|----------|
| NULL |    |          |        | 46 | 63.422     |          |
| trat | 1  | 0.037317 |        | 45 | 63.384     | 0.8468   |

```
> odd.ratio = exp(coef(analise));odd.ratio
(Intercept)    tratT
  0.6470588  1.1239669
> odd.ratio = exp(coef(analise));odd.ratio
(Intercept)    tratT
  0.6470588  1.1239669
> ICbeta1=confint.default(analise,level=0.95);ICbeta1
      2.5 %    97.5 %
(Intercept) -1.193732  0.3230959
tratT       -1.068293  1.3020215
> ICOR1=exp(ICbeta1);ICOR1
      2.5 %    97.5 %
(Intercept) 0.3030880  1.381398
```

tratT      0.3435946 3.676722

### ***FS-1b***

```
> analyse=glm(FS1b~trat, family=binomial)
> summary(analise)
```

Call:

glm(formula = FS1b ~ trat, family = binomial)

Deviance Residuals:

| Min     | 1Q      | Median  | 3Q     | Max    |
|---------|---------|---------|--------|--------|
| -1.1173 | -1.1173 | -0.5863 | 1.2388 | 1.9214 |

Coefficients:

|             | Estimate | Std. Error | z value | Pr(> z ) |
|-------------|----------|------------|---------|----------|
| (Intercept) | -0.1431  | 0.3789     | -0.378  | 0.7057   |
| tratT       | -1.5309  | 0.7344     | -2.084  | 0.0371 * |

(Dispersion parameter for binomial family taken to be 1)

Null deviance: 60.284 on 46 degrees of freedom  
Residual deviance: 55.247 on 45 degrees of freedom  
AIC: 59.247

Number of Fisher Scoring iterations: 3

```
> anova(analise, test="Chi")
Analysis of Deviance Table
```

Model: binomial, link: logit

Response: FS1b

Terms added sequentially (first to last)

|      | Df | Deviance | Resid. | Df | Resid. Dev | Pr(>Chi)  |
|------|----|----------|--------|----|------------|-----------|
| NULL |    |          |        | 46 | 60.284     |           |
| trat | 1  | 5.0364   |        | 45 | 55.247     | 0.02482 * |

```
> odd.ratio = exp(coef(analise));odd.ratio
```

| (Intercept) | tratT     |
|-------------|-----------|
| 0.8666667   | 0.2163462 |

```
> ICbeta1=confint.default(analise,level=0.95);ICbeta1
      2.5 %      97.5 %
```

| (Intercept) | -0.8857936 | 0.59959195 |
|-------------|------------|------------|
|-------------|------------|------------|

| tratT | -2.9703667 | -0.09138453 |
|-------|------------|-------------|
|-------|------------|-------------|

```
> ICOR1=exp(ICbeta1);ICOR1
```

|  | 2.5 % | 97.5 % |
|--|-------|--------|
|--|-------|--------|

| (Intercept) | 0.4123868 | 1.8213754 |
|-------------|-----------|-----------|
|-------------|-----------|-----------|

| tratT | 0.0512845 | 0.9126667 |
|-------|-----------|-----------|
|-------|-----------|-----------|

### ***MS-1***

```
> analyse=glm(MS1~trat, family=binomial)
> summary(analise)
```

Call:

glm(formula = MS1 ~ trat, family = binomial)

Deviance Residuals:

| Min     | 1Q      | Median  | 3Q      | Max    |
|---------|---------|---------|---------|--------|
| -0.8806 | -0.8806 | -0.4717 | -0.4717 | 2.1219 |

Coefficients:

|             | Estimate | Std. Error | z value | Pr(> z ) |
|-------------|----------|------------|---------|----------|
| (Intercept) | -0.7472  | 0.4047     | -1.847  | 0.0648 . |
| tratT       | -1.3929  | 0.8500     | -1.639  | 0.1013   |

(Dispersion parameter for binomial family taken to be 1)

Null deviance: 51.147 on 46 degrees of freedom  
Residual deviance: 47.952 on 45 degrees of freedom  
AIC: 51.952  
Number of Fisher Scoring iterations: 4

```
> anova(analise, test="Chi")
Analysis of Deviance Table
```

Model: binomial, link: logit  
Response: MS1  
Terms added sequentially (first to last)

|      | Df | Deviance | Resid. | Df | Resid. Dev | Pr(>Chi)  |
|------|----|----------|--------|----|------------|-----------|
| NULL |    |          |        | 46 | 51.147     |           |
| trat | 1  | 3.1952   |        | 45 | 47.952     | 0.07385 . |

```
> odd.ratio = exp(coef(analise));odd.ratio
(Intercept)    tratT
  0.4736842  0.2483660
> ICbeta1=confint.default(analise,level=0.95);ICbeta1
      2.5 %    97.5 %
(Intercept) -1.540316 0.04588739
tratT       -3.058837 0.27313340
> ICOR1=exp(ICbeta1);ICOR1
      2.5 %    97.5 %
(Intercept) 0.21431333 1.046957
tratT       0.04694226 1.314076
```

## ***Chinavia impicticornis***

### ***Proportion of response***

```
> analise=glm(Ciresp~Ci, family=binomial)
> summary(analise)
```

Call:  
glm(formula = Ciresp ~ Ci, family = binomial)  
Deviance Residuals:  
Min 1Q Median 3Q Max  
-1.706 -1.144 0.729 0.729 1.212

Coefficients:  

|             | Estimate | Std. Error | z value | Pr(> z )   |
|-------------|----------|------------|---------|------------|
| (Intercept) | 1.1896   | 0.4317     | 2.756   | 0.00585 ** |
| CiCit       | -1.2696  | 0.5887     | -2.157  | 0.03104 *  |

Null deviance: 72.103 on 54 degrees of freedom  
Residual deviance: 67.214 on 53 degrees of freedom  
AIC: 71.214  
Number of Fisher Scoring iterations: 4

```
> anova(analise, test="Chi")
Analysis of Deviance Table
Model: binomial, link: logit
Response: Ciresp
Terms added sequentially (first to last)
```

|      | Df | Deviance | Resid. | Df | Resid. Dev | Pr(>Chi)  |
|------|----|----------|--------|----|------------|-----------|
| NULL |    |          |        | 54 | 72.103     |           |
| Ci   | 1  | 4.8893   |        | 53 | 67.214     | 0.02702 * |

```
> odd.ratio = exp(coef(analise))
> odd.ratio
(Intercept)    CiCit
  3.2857143    0.2809365
> ICbeta1=confint.default(analise,level=0.95);ICbeta1
      2.5 %    97.5 %
(Intercept) 0.3435352 2.0356329
CiCit      -2.4234973 -0.1157563
> ICOR1=exp(ICbeta1);ICOR1
      2.5 %    97.5 %
(Intercept) 1.40992315  7.6570970
CiCit       0.08861118  0.8906923
```

## Female

### *Latency*

```
> dados=read.table("tlcif.txt", h=T)
> attach(dados)
> names(dados)
[1] "Female" "TL"
> shapiro.test(TL)
```

Shapiro-Wilk normality test  
data: TL  
W = 0.87333, p-value = 0.000818

```
> analise=glm(TL~Female, family=quasipoisson)
> summary(analise)
```

Call:  
glm(formula = TL ~ Female, family = quasipoisson)

Deviance Residuals:

| Min     | 1Q     | Median | 3Q    | Max    |
|---------|--------|--------|-------|--------|
| -13.587 | -7.586 | -2.496 | 4.421 | 15.627 |

Coefficients:

|                 | Estimate | Std. Error | t value | Pr(> t )   |
|-----------------|----------|------------|---------|------------|
| (Intercept)     | 4.6266   | 0.1748     | 26.475  | <2e-16 *** |
| FemaleTreatment | -0.4179  | 0.3630     | -1.151  | 0.258      |

(Dispersion parameter for quasipoisson family taken to be 74.88364)  
Null deviance: 2580.7 on 34 degrees of freedom  
Residual deviance: 2474.2 on 33 degrees of freedom  
AIC: NA  
Number of Fisher Scoring iterations: 5

### *Response time*

```
> dados=read.table("tccif.txt", h=T)
> shapiro.test(RT)
```

Shapiro-Wilk normality test  
data: RT  
W = 0.91317, p-value = 0.01363

```
> analise=glm(RT~Female, family=quasipoisson)
```

```
> summary(analise)
```

Call:

```
glm(formula = RT ~ Female, family = quasipoisson)
```

Deviance Residuals:

| Min     | 1Q     | Median | 3Q    | Max    |
|---------|--------|--------|-------|--------|
| -19.430 | -1.493 | 1.672  | 4.176 | 15.238 |

Coefficients:

|                 | Estimate | Std. Error | t value | Pr(> t )   |
|-----------------|----------|------------|---------|------------|
| (Intercept)     | 6.66158  | 0.05491    | 121.315 | <2e-16 *** |
| FemaleTreatment | -0.02490 | 0.10448    | -0.238  | 0.813      |

(Dispersion parameter for quasipoisson family taken to be 54.21708)

Null deviance: 1812.0 on 31 degrees of freedom

Residual deviance: 1808.9 on 30 degrees of freedom

AIC: NA

Number of Fisher Scoring iterations: 4

## Male

### Latency

```
> dados=read.table("tlcim.txt", h=T)
```

```
> shapiro.test(TL)
```

Shapiro-Wilk normality test

data: TL

W = 0.83963, p-value = 0.0003071

```
> analise=glm(TL~Machos, family=quasipoisson)
```

```
> summary(analise)
```

Call:

```
glm(formula = TL ~ Machos, family = quasipoisson)
```

Deviance Residuals:

| Min     | 1Q     | Median | 3Q    | Max    |
|---------|--------|--------|-------|--------|
| -12.697 | -8.604 | -5.761 | 5.499 | 20.653 |

Coefficients:

|                 | Estimate | Std. Error | t value | Pr(> t )   |
|-----------------|----------|------------|---------|------------|
| (Intercept)     | 4.474    | 0.222      | 20.155  | <2e-16 *** |
| MachosTreatment | 0.196    | 0.385      | 0.509   | 0.615      |

(Dispersion parameter for quasipoisson family taken to be 95.03718)

Null deviance: 2636.1 on 30 degrees of freedom

Residual deviance: 2612.0 on 29 degrees of freedom

AIC: NA

Number of Fisher Scoring iterations: 5

## Response Time

```
> dados=read.table("tccim.txt", h=T)
```

```
> attach(dados)
```

```
> names(dados)
```

```
[1] "Male" "RT"
```

```
> shapiro.test(RT)
```

Shapiro-Wilk normality test

data: RT



aW = 0.93531, p-value = 0.06126

```
> analyse=glm(RT~Male, family=quasipoisson)
> summary(analise)
```

Call:

```
glm(formula = RT ~ Male, family = quasipoisson)
```

Deviance Residuals:

| Min     | 1Q     | Median | 3Q    | Max    |
|---------|--------|--------|-------|--------|
| -28.828 | -7.623 | -1.617 | 5.665 | 18.187 |

Coefficients:

|               | Estimate | Std. Error | t value | Pr(> t )   |
|---------------|----------|------------|---------|------------|
| (Intercept)   | 6.71913  | 0.07648    | 87.853  | <2e-16 *** |
| MaleTreatment | -0.37910 | 0.14624    | -2.592  | 0.0148 *   |

(Dispersion parameter for quasipoisson family taken to be 96.87755)

Null deviance: 3776.9 on 30 degrees of freedom

Residual deviance: 3090.5 on 29 degrees of freedom

AIC: NA

Number of Fisher Scoring iterations: 5

### ***Proportion of couple formation***

```
> res = prop.test(x = c(12, 7), n = c(23, 12))
```

```
> res
```

2-sample test for equality of proportions with continuity correction

data: c(12, 7) out of c(23, 12)

X-squared = 8.1683e-31, df = 1, p-value = 1

alternative hypothesis: two.sided

95 percent confidence interval:

-0.4688521 0.3456637

sample estimates:

| prop 1    | prop 2    |
|-----------|-----------|
| 0.5217391 | 0.5833333 |

### ***Proportion of copulation***

```
> analyse=glm(Cicop~Ci, family=binomial)
```

```
> summary(analise)
```

Call:

```
glm(formula = Cicop ~ Ci, family = binomial)
```

Deviance Residuals:

| Min     | 1Q      | Median  | 3Q     | Max    |
|---------|---------|---------|--------|--------|
| -1.0108 | -1.0108 | -0.8106 | 1.3537 | 1.5956 |

Coefficients:

|             | Estimate | Std. Error | z value | Pr(> z ) |
|-------------|----------|------------|---------|----------|
| (Intercept) | -0.4055  | 0.3727     | -1.088  | 0.277    |
| CiCit       | -0.5390  | 0.5808     | -0.928  | 0.353    |

(Dispersion parameter for binomial family taken to be 1)

Null deviance: 70.905 on 54 degrees of freedom

Residual deviance: 70.028 on 53 degrees of freedom

AIC: 74.028

Number of Fisher Scoring iterations: 4

```
> anova(analise, test="Chi")
```

Analysis of Deviance Table  
 Model: binomial, link: logit  
 Response: Cicop  
 Terms added sequentially (first to last)

|      | Df | Deviance | Resid. Df | Resid. Dev | Pr(>Chi) |
|------|----|----------|-----------|------------|----------|
| NULL |    |          | 54        | 70.905     |          |
| Ci   | 1  | 0.87624  | 53        | 70.028     | 0.3492   |

```
> odd.ratio = exp(coef(analise));odd.ratio
(Intercept)    CiCit
  0.6666667  0.5833333
> ICbeta1=confint.default(analise,level=0.95);ICbeta1
      2.5 %    97.5 %
(Intercept) -1.135901 0.3249703
CiCit       -1.677297 0.5993045
> ICOR1=exp(ICbeta1);ICOR1
      2.5 %    97.5 %
(Intercept) 0.3211328  1.383990
CiCit       0.1868783  1.820852
```

## Signals

### FS-1a

```
> analise=glm(FS1a~trat, family=binomial)
> summary(analise)
```

Call:  
 glm(formula = FS1a ~ trat, family = binomial)

Deviance Residuals:

| Min     | 1Q      | Median  | 3Q     | Max    |
|---------|---------|---------|--------|--------|
| -1.0108 | -1.0108 | -0.5056 | 1.3537 | 2.0593 |

Coefficients:

|             | Estimate | Std. Error | z value | Pr(> z ) |
|-------------|----------|------------|---------|----------|
| (Intercept) | -0.4055  | 0.3727     | -1.088  | 0.2766   |
| tratT       | -1.5870  | 0.7195     | -2.206  | 0.0274 * |

(Dispersion parameter for binomial family taken to be 1)

Null deviance: 64.455 on 54 degrees of freedom  
 Residual deviance: 58.727 on 53 degrees of freedom  
 AIC: 62.727  
 Number of Fisher Scoring iterations: 4

```
> anova(analise, test="Chi")
Analysis of Deviance Table
```

Model: binomial, link: logit  
 Response: FS1a  
 Terms added sequentially (first to last)

|      | Df | Deviance | Resid. Df | Resid. Dev | Pr(>Chi) |
|------|----|----------|-----------|------------|----------|
| NULL |    |          | 54        | 64.455     |          |
| trat | 1  | 5.7278   | 53        | 58.727     | 0.0167 * |

```
> odd.ratio = exp(coef(analise));odd.ratio
(Intercept)    tratT
  0.6666667  0.2045455
> ICbeta1=confint.default(analise,level=0.95);ICbeta1
```

```

      2.5 %   97.5 %
(Intercept) -1.135901 0.3249703
tratT      -2.997146 -0.1767839
> ICOR1=exp(ICbeta1);ICOR1
      2.5 %   97.5 %
(Intercept) 0.32113279 1.3839896
tratT       0.04992935 0.8379609

```

### **FS-1b**

```

> analyse=glm(FS1b~trat, family=binomial)
> summary(analise)

```

Call:

```
glm(formula = FS1b ~ trat, family = binomial)
```

Deviance Residuals:

```

  Min    1Q  Median    3Q   Max
-1.066 -1.066 -1.011  1.293  1.354

```

Coefficients:

```

      Estimate Std. Error  z value Pr(>|z|)
(Intercept) -0.2683    0.3684  -0.728   0.467
tratT       -0.1372    0.5499  -0.249   0.803
(Dispersion parameter for binomial family taken to be 1)
Null deviance: 74.767  on 54  degrees of freedom
Residual deviance: 74.704  on 53  degrees of freedom
AIC: 78.704

```

Number of Fisher Scoring iterations: 4

```

> anova(analise, test="Chi")
Analysis of Deviance Table

```

Model: binomial, link: logit

Response: FS1b

Terms added sequentially (first to last)

```

      Df Deviance Resid. Df  Resid. Dev Pr(>Chi)
NULL                                54   74.767
trat      1      0.062329   53   74.704    0.8029
> odd.ratio = exp(coef(analise));odd.ratio
(Intercept)  tratT
  0.7647059  0.8717949
> ICbeta1=confint.default(analise,level=0.95);ICbeta1
      2.5 %   97.5 %
(Intercept) -0.9903893 0.4538613
tratT      -1.2150268 0.9406245
> ICOR1=exp(ICbeta1);ICOR1
      2.5 %   97.5 %
(Intercept) 0.3714321 1.574380
tratT       0.2967021 2.561581

```

### **MS-1**

```

> analyse=glm(MS1~trat, family=binomial)
> summary(analise)

```

Call:

```
glm(formula = MS1 ~ trat, family = binomial)
```

Deviance Residuals:

```

  Min    1Q  Median    3Q   Max

```

-1.121 -1.121 -1.011 1.235 1.354

Coefficients:

|             | Estimate | Std. Error | z value | Pr(> z ) |
|-------------|----------|------------|---------|----------|
| (Intercept) | -0.1335  | 0.3660     | -0.365  | 0.715    |
| tratT       | -0.2719  | 0.5483     | -0.496  | 0.620    |

(Dispersion parameter for binomial family taken to be 1)

Null deviance: 75.353 on 54 degrees of freedom

Residual deviance: 75.106 on 53 degrees of freedom

AIC: 79.106

Number of Fisher Scoring iterations: 4

> anova(analise, test="Chi")

Analysis of Deviance Table

Model: binomial, link: logit

Response: MS1

Terms added sequentially (first to last)

|      | Df | Deviance | Resid. Df | Resid. Dev | Pr(>Chi) |
|------|----|----------|-----------|------------|----------|
| NULL |    |          | 54        | 75.353     |          |
| trat | 1  | 0.24688  | 53        | 75.106     | 0.6193   |

> odd.ratio = exp(coef(analise));odd.ratio

|  | (Intercept) | tratT     |
|--|-------------|-----------|
|  | 0.8750000   | 0.7619048 |

> ICbeta1=confint.default(analise,level=0.95);ICbeta1

|             | 2.5 %      | 97.5 %    |
|-------------|------------|-----------|
| (Intercept) | -0.8508048 | 0.5837420 |
| tratT       | -1.3465147 | 0.8026472 |

> ICOR1=exp(ICbeta1);ICOR1

|             | 2.5 %     | 97.5 %   |
|-------------|-----------|----------|
| (Intercept) | 0.4270711 | 1.792734 |
| tratT       | 0.2601454 | 2.231440 |

## MS-2

> analise=glm(MS2~trat, family=binomial)

> summary(analise)

Call:

glm(formula = MS2 ~ trat, family = binomial)

Deviance Residuals:

| Min     | 1Q      | Median  | 3Q      | Max    |
|---------|---------|---------|---------|--------|
| -0.7290 | -0.7290 | -0.5905 | -0.5905 | 1.9145 |

Coefficients:

|             | Estimate | Std. Error | z value | Pr(> z )   |
|-------------|----------|------------|---------|------------|
| (Intercept) | -1.1896  | 0.4317     | -2.756  | 0.00585 ** |
| tratT       | -0.4686  | 0.6957     | -0.674  | 0.50053    |

(Dispersion parameter for binomial family taken to be 1)

Null deviance: 55.044 on 54 degrees of freedom

Residual deviance: 54.580 on 53 degrees of freedom

AIC: 58.58

Number of Fisher Scoring iterations: 4

> anova(analise, test="Chi")

Analysis of Deviance Table

Model: binomial, link: logit

Response: MS2  
Terms added sequentially (first to last)

|      | Df | Deviance | Resid. Df | Resid. Dev | Pr(>Chi) |
|------|----|----------|-----------|------------|----------|
| NULL |    |          | 54        | 55.044     |          |
| trat | 1  | 0.46441  | 53        | 54.580     | 0.4956   |

```
> odd.ratio = exp(coef(analise));odd.ratio  
(Intercept)    tratT  
  0.3043478  0.6258503  
> ICbeta1=confint.default(analise,level=0.95);ICbeta1  
      2.5 %    97.5 %  
(Intercept) -2.035633 -0.3435352  
tratT      -1.832129  0.8948405  
> ICOR1=exp(ICbeta1);ICOR1  
      2.5 %    97.5 %  
(Intercept) 0.1305978  0.7092585  
tratT       0.1600725  2.4469455
```
