# Supplementary material for: Inhibitory Copulation Effect of Vibrational Rival Female Signals of Three Stink Bug Species as a Tool for Mating Disruption
Source: MDPI journal article supplement (doi:10.3390/insects12020177), 2021-02-18

## Supplementary material Figure S2

### Inhibitory copulation effect of vibrational rival female signals of three stink bug species as a tool for mating disruption

Aline Moreira Dias, Miguel Borges, Maria Carolina Blassioli Moraes, Matheus Lorrán Figueira Coelho, Andrej Čokl, Raul Alberto Laumann

Figure S2. General setup of the play back experiments.

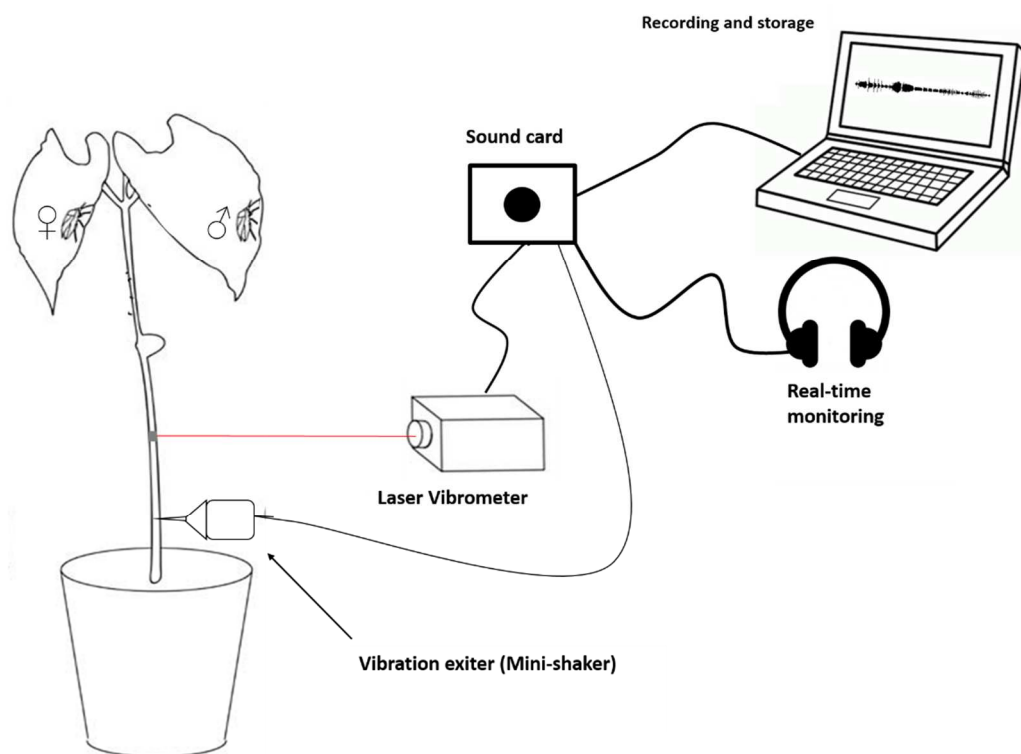

Supplement: s1 [file s1]
