# Supplementary material for: Inhibitory Copulation Effect of Vibrational Rival Female Signals of Three Stink Bug Species as a Tool for Mating Disruption
Source: MDPI journal article supplement (doi:10.3390/insects12020177), 2021-02-18

## Figure S1

### **Inhibitory copulation effect of vibrational rival female signals of three stink bug species as a tool for mating disruption**

Aline Moreira Dias, Miguel Borges, Maria Carolina Blassioli Moraes, Matheus Lorrán Figueira Coelho, Andrej Čokl, Raul Alberto Laumann

Figure S1. Oscillograms of stimulation programs used in the play back experiments. Figures show a complete sequence of pulses (with the total duration at right) of one stimulation programs for each species studied and a detail (marked in the stimulation program with a red square) of a sequence of pulses with the correspondent one second scale. *Euschistus heros*: sequences of rival songs of three different female rival interactions. *Chinavia ubica*: a long sequence of rival songs from one female rival interaction. *Chinavia impicticornis*: sequence of alternation of FS-1b of two different female rival interactions.

*Euschistus heros*

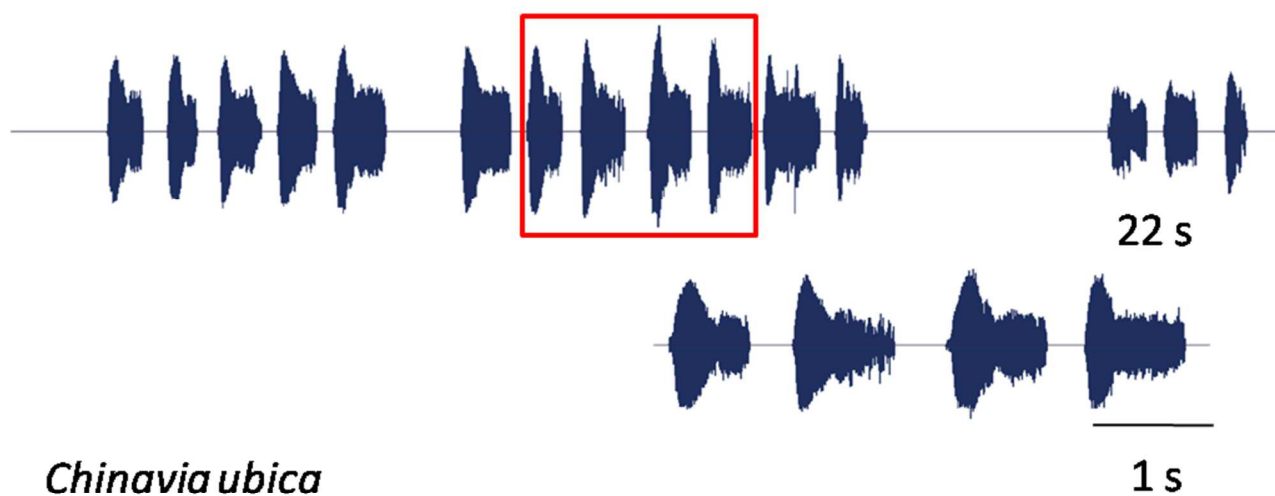

*Chinavia ubica*

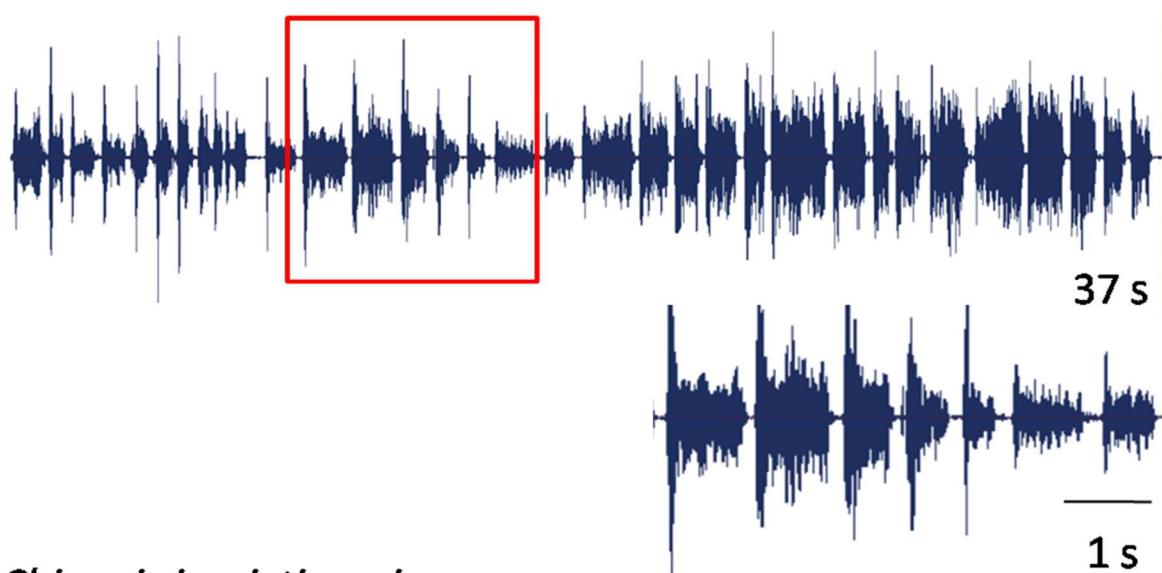

*Chinavia impicticornis*

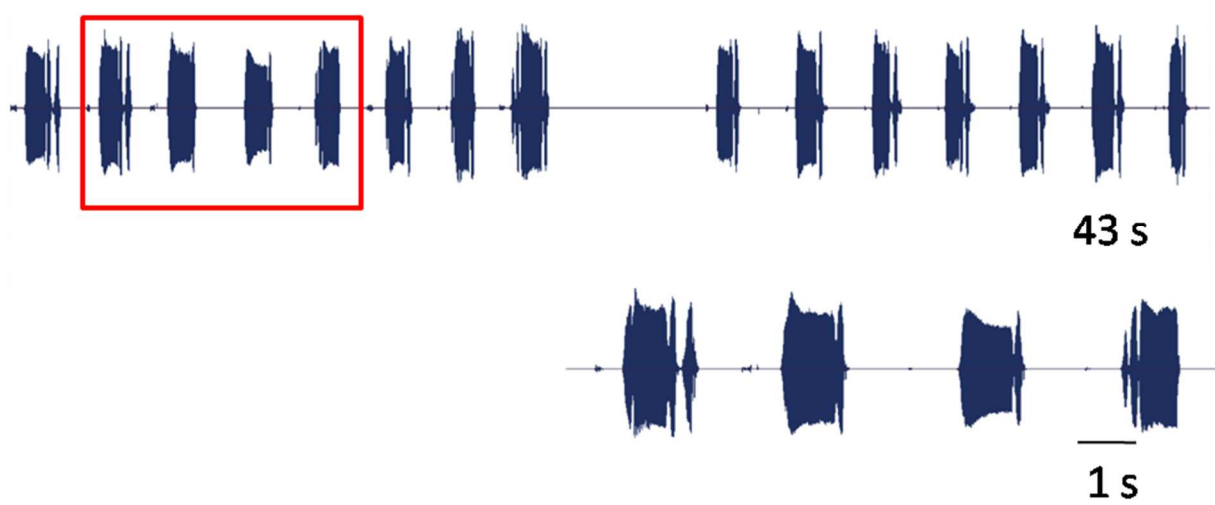

Supplement: s1 [file s1]
